# Supplementary material for: GIS-models with fuzzy logic for Susceptibility Maps of debris flow using multiple types of parameters: A Case Study in Pinggu District of Beijing, China
Source: Copernicus journal article supplement (doi:10.5194/nhess-2021-254), 2021-09-20
Supplement: Supplementary file [file nhess-2021-254-AC2-supplement.pdf]

1 ***Reviewer #2's Comments***

2 ***1. General comments***

3 I have only partially revised the manuscript "GIS-models with fuzzy logic for Susceptibility  
4 Maps of debris flow using multiple types of parameters: A Case Study in Pinggu District of  
5 Beijing, China". The manuscript deals with the application of susceptibility analysis on debris  
6 flow and could be interesting for the journal. Unfortunately, the manuscript is not written in a  
7 good English and many statements and descriptions are very difficult to understand. I revised only  
8 up to line 203 (3.4.2 Data-driven method in susceptibility modelling). I recommend the authors to  
9 submit a revised version of the manuscript after the revision of an English-speaking person. Few  
10 comments are throughout the text.

11 ***Response:*** Thank you very much for your valuable and constructive comments on this manuscript.  
12 Your comments are very helpful for us to improve the manuscript. Thank you for your suggestions  
13 on the language. These suggestions were of great help and improved the quality of our manuscript.  
14 According to your suggestions, we will send our manuscript to professional language  
15 embellishment agency and foreign students who are English-speaking person. Hope the final  
16 revision can meet your requirements. In the following, we will reply to and explain the language  
17 comments one by one to clarify our intended meaning. Please see the specific responses below for  
18 more details.

19

20 ***2. Specific comments***

21 ***Comment 1:*** Line 54, the sentence "in the early days, the susceptibility assessment of debris flows  
22 was mainly qualitative research" is not completely true.

23 ***Response:*** Thank you for your professional comments. We apologize for the misunderstanding  
24 caused by our expression. We would like to say that before 1970, the limitations of remote sensing  
25 and computer technology caused more studies to be expressed without a very precise  
26 quantification. Based on your comments and a review of the relevant literature, we think it is more  
27 appropriate to remove this ambiguous expression.

28

29 ***Comment 2:*** Line 62, the sentence "Surely, they are also wasteful and unnecessary" has English  
30 problem

31 ***Response:*** Thank you for your professional comments. We apologize for the misunderstanding  
32 caused by our expression. We have reread this paragraph and consider it redundant and ambiguous.  
33 The sentence should be deleted.

34

35 **Comment 3:** Line 62, what is 3S?

36 **Response:** Thank you for your professional comments. 3S is mean 3S technology, which is  
37 Remote sensing, Geography information systems, Global positioning systems. We apologize for  
38 the use of abbreviations without explanation.

39

40 **Comment 4:** Line 66, the sentence “While due to the nonlinearity of debris flow system and the  
41 openness and complexity of geological environment, we realize that it is chaotic, with many  
42 factors affecting the system.” need to be revised.

43 **Response:** Thank you for your professional comments. We reorganized the intention and made it  
44 clearer. It is revised below. “As research progresses, debris flows are increasingly seen as an open  
45 system. There are many factors influencing the system and the combination of factors is  
46 non-linear and the interactions are chaotic.”

47

48 **Comment 5:** Line 73-76, the sentence “According to the summary above, the primary object of  
49 my present study is to explore a geographic information system (GIS)-based quantitative model  
50 based on expert experience and field investigation. And the model is consistent with the system  
51 characteristics of debris flow gully and can also indicate the characteristics of disaster chain and  
52 that the geomorphic evolution of basin rather than simple data fitting(Porwal et al. 2006).” has  
53 English problem, it is not clear and correct.

54 **Response:** Thank you for your professional comments. We apologize for any confusion caused by  
55 the lack of English expression skills. We have rewritten the sentence below. “The main objective  
56 of this paper is to propose a quantitative geographic information system (GIS)-based model. The  
57 results of expert experience scoring and site surveys are used as guidance and reference in the  
58 modelling process. We have tried to apply methods that can indicate the non-linearity of the debris  
59 flow system. Finally, the modelling process should respect the laws of geomorphological  
60 evolution and the geological basis. Otherwise, the result will tend to be simply data fitting (Porwal  
61 et al. 2006).”

62

63 **Comment 6:** Line 79, terrain should be replaced by elevation

64 **Response:** Thank you for your professional comments. We have replaced the word.

65

66 **Comment 7:** Line 84, the sentence “political factors must be taken into account” is not clear

67 **Response:** Thank you for your professional comments. Different administrative regions often have

68 different financial incomes. The situation will lead to different standards and economic  
69 investments in the prevention and treatment of geological hazards. Therefore, different decisions  
70 will be made for hazards of the same level. This is what we mean by "political factors".

71

72 **Comment 8:** Line 87, explain the meaning of the sentence “precision of the base map and the size  
73 of the study area”.

74 **Response:** Thank you for your professional comments. Base map mainly refers to geological map  
75 and digital elevation map (DEM) in this paper. The geological map is 1: 50 000 and the accuracy  
76 of dem is 30 m. We think the above precision is suitable for the study area. In other words, it is not  
77 appropriate to use the above-mentioned precision map to study global scales.

78

79 **Comment 9:** Line 91, the sentence “drainage basins unit”, explain what they area

80 **Response:** Thank you for your professional comments. The “drainage basins unit” are showed in  
81 Fig.4 line 128.

82

83 **Comment 10:** Line 95, explain the sentence “obvious watershed characteristics”

84 **Response:** Thank you for your professional comments. In our research, typical valley debris flows  
85 are the major research object. Therefore, as shown in the figure below, A has typical watershed  
86 characteristics, but B and C do not. There is another advantage of determining the length of the  
87 main ditch in the watershed parameter characteristics. For watersheds without obvious watershed  
88 characteristics, it is difficult to determine their length from the picture. Similarly, the calculation of  
89 drainage density is very difficult.

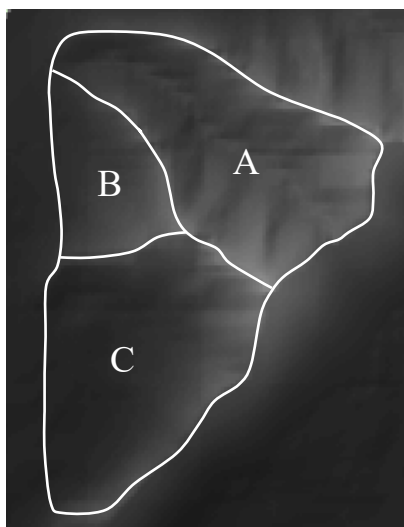

90

91

92 **Comment 11:** Line 98-99, the sentence “it is scientific to make full use of qualitative  
93 understanding to determine the weight of the parameters of watershed characteristics factors” is  
94 not clear.

95 **Response:** Thank you for your professional comments. We have reorganized our language: field  
96 inspection is generally required in geological hazard surveys. If the data from the field inspection  
97 is applied to the model, it can help the model building and reduce the time for model training. The  
98 weights derived from the grey relational analysis method used in the following section (in section  
99 3.4.1) are based on the data from the field inspection.

100

101 **Comment 12:** Line 102, explain better the workflow

102 **Response:** Thank you for your professional comments. First, a DEM map of the Pinggu area was  
103 downloaded. Then, the basin units are then generated from the DEM map using the ArcHydro tool.  
104 The derived results were analyzed and units that did not fit the characteristics of the watershed  
105 were removed. During the analysis, the field survey data and Google images were referenced.  
106 After that, the controlling and triggering factors for the remaining 135 catchments were counted.  
107 For the fuzzy memberships, watershed characteristic parameters were determined by grey  
108 correlation and the geological and geomorphological factors were determined by the frequency  
109 ratio (FR) method and the cosine amplitude method. Finally, the individual layers were overlaid  
110 by fuzzy logic operations to obtain the final assessment map. As there were different combinations  
111 of factors, 17 results were derived. In order to compare advantages and disadvantages of these  
112 results, three indexes, AUC, AR and RR, were used to evaluate the models.

113

114 **Comment 13:** Line 104-105, this is also a local property

115 **Response:** Thank you for your professional comments. This statement was made to emphasize the  
116 importance of micro-landscapes in the evaluation, which is why we included the parameter  
117 roughness in the model.

118

119 **Comment 14:** Line 107-109, the sentence “Finally, the model should also need to integrate the  
120 system characteristics of debris flow disaster, the future development trend of climate change, and  
121 the social demand under the theoretical background of the new era to carry out reasonable  
122 modeling” has English problem

123 **Response:** Thank you for your professional comments. The sentence has been revised. “Finally,  
124 the model is expected to reflect the system characteristics, the trend of climate change, and the  
125 social demand.”

126

127 **Comment 15:** Line 111, The workflow should be explained.

128 **Response:** Thank you for your professional comments. I have replied to this comment. Please  
129 refer to **Comment 13** above for details.

130

131 **Comment 16:** Line 112, explain better how did you completed the debris flows inventory

132 **Response:** Thank you for your professional comments. All the cataloguing process is carried out  
133 on the ArcGIS software. The specific process is divided into the following steps: (1) Filling the  
134 initial digital elevation model to eliminate the common errors caused by the resolution and  
135 rounding of the data. (2) Encoding the outflow direction of each pixel in the grid based on an  
136 8-direction algorithm. (3) Calculating accumulated flow as the accumulated weight of all cells  
137 flowing into each downslope cell in the output raster. (4) Applying a threshold to the results  
138 obtained by the flow accumulation tool based on a condition function and describing the drainage  
139 network of the study area. (5) Extracting the basic drainage basins unit of the study area, that is,  
140 the basic unit for susceptibility assessment. The fourth of five steps, threshold determination is a  
141 factor of subjective human choice, and my current research involves how to choose this parameter  
142 objectively.

143

144 **Comment 17:** Line 119, what is difference with the slope unit.

145 **Response:** Thank you for your professional comments. In general, the main difference is the way  
146 in which they are defined. A slope unit is a basic closed unit enclosed by a ridge and valley line.  
147 Basin units, on the other hand, often consist of at least two slope units. This is shown in the figure  
148 below.

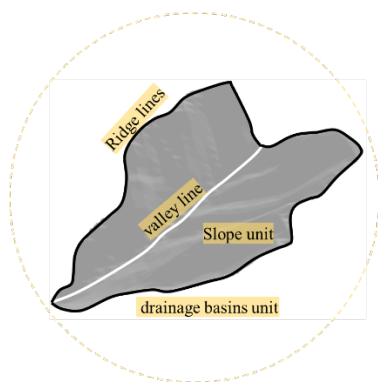

149

150 **Comment 18:** Line 120, the phrase “irregular areas”. What do you mean? It is not clear why you  
151 have selected only 135 basins.

152 **Response:** Thank you for your professional comments. irregular areas refers to areas which are  
153 not basin units automatically generated by using ArcHydro tool, such as slope unit in **Comment 18**.  
154 We admit that there is a certain subjective component (extent depending on the accuracy of the  
155 DEM), but it is proven to be an attempt to improve the accuracy of the model. When deleted and

156 merged, there are 135 basins left.

157

158 **Comment 19:** Line 133, facros should be replaced by factors.

159 **Response:** Thank you for your professional comments. We have replaced the wrong word.

160

161 **Comment 20:** Line 135, the phrase “in this paper” should be deleted.

162 **Response:** Thank you for your professional comments. It has been deleted.

163

164 **Comment 21:** Line 138, the sentence “is bounded by the watershed”. What do you mean?

165 **Response:** Thank you for your professional comments. The statistics for these factors are based on  
166 the watershed as a basic unit and the parameters change as the delineated watershed changes.  
167 Geological factors, however, are not bound by geological boundary lines. For example, the same  
168 stratigraphic lithology can span several watersheds.

169

170 **Comment 22:** Line 143-144, we indirectly consider the influence of natural loose material source  
171 by evaluating geological conditions, but cannot consider the impact of human activities. It is not  
172 clear what is the relationship between the two factors

173 **Response:** Thank you for your professional comments. The sources of debris flow in the study  
174 area include both naturally occurring and anthropogenic sources (road construction, mining).  
175 Natural sources can be evaluated indirectly by relevant factors (geological and geomorphological  
176 conditions), but the intensity of anthropogenic sources cannot be predicted. Moreover, the  
177 thickness cannot be clearly counted on remote sensing images. Therefore, the evaluation factor  
178 can indirectly consider the influence of natural loose material source, but not human-generated  
179 loose source (slag, gravel soil, etc.)

180

181 **Comment 23:** Line 149 in Table 1, the phrase “derived from DEM”. Automatically?

182 **Response:** Thank you for your professional comments. It is not derived automatically. Firstly, we  
183 first determine the scope of the basin according to DEM. When the scope is determined, it can be  
184 directly in ArcGIS 10.2 calculate and count the projected area value of each watershed. The rest of  
185 the factors are the same steps

186

187 **Comment 24:** Line 149 in Table 1, the word “numerical” should be deleted.

188 **Response:** Thank you for your professional comments. It has been deleted.

189

190 **Comment 25:** Line 149 in Table 1, the sentence “higher frequency of slope failures” is not always  
191 true.

192 **Response:** Thank you for your professional comments. We understand what you arguement, that  
193 this is not a linear increase. what we are describing is that all other conditions are constant and  
194 only this one variable is present. In terms of mechanics , the greater the slope, the greater the  
195 downward component of gravity, and the more likely it is to slide. We will try other expressions to  
196 prevent this ambiguity.

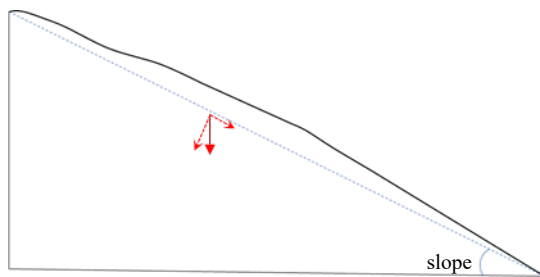

197

198

199 **Comment 26:** Line 156, “curve length” is not clear. Why curve?

200 **Response:** Thank you for your professional comments. This is a mathematical concept. As shown  
201 in Fig. 5, relative to the linear connection between two points (A<sub>7</sub>), the connection line is called  
202 curve line in this paper. And its length is called curve length.

203

204 **Comment 27:** Line 159-161, the sentence “Fuzzy set theory proposed by Zadeh (1965) is a  
205 effective method to express the concept of partial set membership degree. This concept is different  
206 from the classical binary (two-valued) logic by using fuzzy descriptions such as low, moderate,  
207 high, steep, favourable and close to (Kritikos and Davies 2015).” Should be rephrased.

208 **Response:** Thank you for your professional comments. The sentence has been rephrased. “Fuzzy  
209 set theory is proposed by Zadeh (1965). It is an efficient way of expressing the concept of partial  
210 set membership degree. This concept differs from classical binary(0-1 value) logic. More words  
211 with a transitional fuzzy descriptions (such as low, medium, and high) are used (Kritikos and  
212 Davies 2015). This fuzzy expression is particularly applicable to geological hazard classification.”

213

214 **Comment 28:** Line 191 in table 2, why only same basins are shown in the table.

215 **Response:** Thank you for your professional comments. “gully” represents “the name of the gully”,  
216 “score” represents “the score of the gully”. We have modified the format to remove the ambiguity.

217

218 **Comment 29:** Line 191 in table 2, where this score comes from?

219 **Response:** Thank you for your professional comments. According to the “Specifications for  
 220 Geological Investigation of Debris Flows Stabilization (DZ/T0220-2006) (2006)” published by the  
 221 China Ministry of Lands and Resources. It is an industry standard that we need to follow for field  
 222 surveys. Likewise, if in another country, people could use their local standards. This is also the  
 223 flexibility of the model

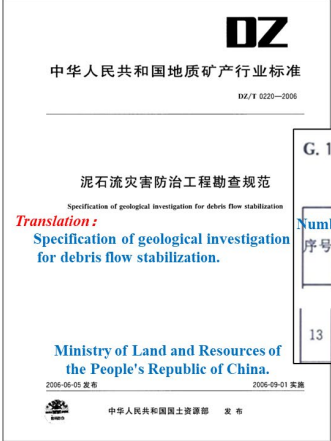

**DZ**  
 中华人民共和国地质矿产行业标准  
 DZ/T 0220-2006

泥石流灾害防治工程勘查规范  
 Specification of geological investigation for debris flow stabilization  
 Translation:  
 Specification of geological investigation for debris flow stabilization.

Ministry of Land and Resources of the People's Republic of China.  
 2006-06-05发布 2006-09-01实施  
 中华人民共和国国土资源部 发布

**G.1 泥石流沟易发程度量化评分标准** Quantitative scoring standard for the susceptibility of debris flow gully.  
**表 G.1 泥石流沟易发程度量化评分表** Quantitative scoring table for the susceptibility of debris flow gully.

| Number<br>序号 | Factor<br>影响因素        | Classification 量级划分                     |                                        |                                                                     |                        |
|--------------|-----------------------|-----------------------------------------|----------------------------------------|---------------------------------------------------------------------|------------------------|
|              |                       | 极易发(A)<br>得分<br>score                   | 中等易发(B)<br>得分<br>score                 | 轻度易发(C)<br>得分<br>score                                              | 不易发生(D)<br>得分<br>score |
|              |                       | Extremely high                          | Moderate                               | Low                                                                 | Extremely low          |
| 13           | Drainage area<br>流域面积 | 0.2 km <sup>2</sup> ~ 5 km <sup>2</sup> | 5 km <sup>2</sup> ~ 10 km <sup>2</sup> | 0.2 km <sup>2</sup> 以下、<br>10 km <sup>2</sup> ~ 100 km <sup>2</sup> | >100 km <sup>2</sup>   |
|              |                       | 5                                       | 4                                      | 3                                                                   | 1                      |

224

225

226 **Comment 30:** Line 196-197, the sentence “it can be seen from the results that the occurrence of  
 227 debris flow is highly correlated with basin volume, basin area and main gully bending coefficient  
 228 with fuzzy membership above 0.7 in Beijing area.” How do you explain this behaviour.

229 **Response:** Thank you for your professional comments. This is a regional attribute and regular  
 230 characteristics of debris flow development in the study area. Debris flows occur mostly during the  
 231 rainy season (June to August). Moreover, the study area is characterized by short duration heavy  
 232 rainfall and the distribution of rainfall is not significantly different across the study area. The  
 233 source of the loose material therefore becomes the dominant factor. And the three factors  
 234 mentioned above are highly correlated with total physical sources. Both basin area and basin  
 235 volume determine the upper limit of the maximum source, while the bending factor directly  
 236 influences the replenishment of loose sources along the debris flow ditch.

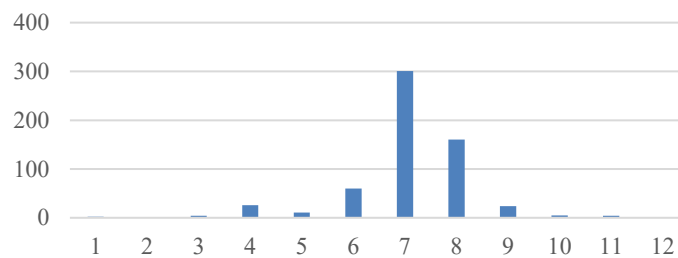

237

238

Monthly rainfall in Pinggu district, Beijing, 2018

239



240 **Comment 31:** Line 197-202, the English expressions “In the case of sufficient rainfall, the basin  
241 directly determines the total amount of catchment, and the bending coefficient reflects the  
242 replenishment of the source along the river. The basin volume is closely related to the number of  
243 supplementary sources. Therefore, it is necessary to do well in rainfall monitoring and early  
244 warning in large watersheds, check for loose matter accumulation in river basins before rainy  
245 season, and pay attention to slope protection of basin with large volume potential energy for the  
246 purpose of disaster prevention and reduction” should be revised.

247 **Response:** Thank you for your professional comments. The sentence has been revised. “Rainfall  
248 in the study area is abundant to induce the debris flow. Loose source and sinks the total volume of  
249 catchment become more important. The watershed area determines the total volume of catchment.  
250 For the same rainfall, generally, the larger the area, the larger the catchment is. The bending  
251 coefficient reflects the replenishment sources along the channel. The greater the coefficient, the  
252 slower the flow is. Then loose source along the channel has more time to replenish. Basin volume  
253 characterizes the maximum amount of loose material that can be supplied. These three features  
254 reflect the development characteristics of debris flow in the study area. It also provides ideas for  
255 disaster prevention and mitigation.

256

257 **Comment 32:** Line 204, the expression “landslide is one of the main fixed sources of debris flow”  
258 is not clear.

259 **Response:** Thank you for your professional comments. Excluding human activities, such as  
260 mining, construction, etc., loose material produced by natural geological processes is the primary  
261 source of debris flow formation. Great debris flows may result from numerous, small slope  
262 failures that subsequently coalesce (Fairchild 1987; Roeloffs 1996), from flow enlargement due to  
263 incorporation of bed and bank debris (Bovis and Dagg 1992; Pierson et al. 1990), or from large,  
264 individual landslides that mobilize partially or almost totally (Iverson et al. 1997; Vallance and  
265 Scott 1997). Debris flows may also scour steep channels to bedrock and accelerate sediment  
266 delivery to downstream, lower-gradient channels. The spatial and temporal distribution of shallow  
267 landslides are important controls on landscape evolution and a major component of both natural  
268 and management-related disturbance regimes in mountain drainage basins (Benda 1987; Crozier et  
269 al. 1990; Dietrich et al. 1986; Tsukamoto et al. 1982).

270 **Cited Reference:**

271 Fairchild LH (1987) The importance of lahar initiation processes *Reviews in Engineering Geology*  
272 7:51-62 doi:10.1130/REG7-p51

273 Roeloffs E (1996) Poroelastic techniques in the study of earthquake-related hydrologic  
274 phenomena 38:135-195 doi:10.1016/S0065-2687(08)60270-8

275 Bovis M, Dagg B (1992) Debris flow triggering by impulsive loading - mechanical modeling and  
276 case-studies *Canadian Geotechnical Journal* 29:345-352 doi:10.1139/t

277 Iverson RM (1997) The physics of debris flows *Reviews of Geophysics* 35:245-296.  
278 doi:10.1029/97RG00426  
279 Vallance JW, Scott KM (1997) The Osceola mudflow from mount rainier: Sedimentology and  
280 hazard implications of a huge clay-rich debris flow *Geological Society of America Bulletin*  
281 109:143-163 doi:10.1130/0016-7606(1997)109<0143:TOMFMR>2.3.CO;2  
282 Pierson TC, Janda RJ, Thouret J-C, Borrero CA (1990) Perturbation and melting of snow and ice  
283 by the 13 November 1985 eruption of Nevado del Ruiz, Colombia, and consequent  
284 mobilization, flow and deposition of lahars *Journal of Volcanology and Geothermal Research*  
285 41:17-66 doi:10.1016/0377-0273(90)90082-q

286 Thank you for your professional comments. We apologize for the bad reading experience  
287 caused by our poor English. We also hope that language issues will not become a barrier to  
288 scientific communication and that you will Reconsidering our research beyond the language issue.  
289 We will try our best to improve the manuscript and make changes in the manuscript. We  
290 appreciate for Editors/Reviewer's warm work earnestly, and hope that the revision will meet with  
291 approval. Once again, thank you very much for your comments and suggestions! Please feel free  
292 to contact me, if any further changes are required. We look forward to hearing from you.

293 Yours sincerely,

294 Qing Wang, Ph.D.

295 College of Construction Engineering, Jilin University

296 938 Ximinzhu Road, Changchun 130026, China

297 Phone number: +86 13843047952

298 E-mail: wangqing@jlu.edu.cn
