# Supplementary material for: GIS-models with fuzzy logic for Susceptibility Maps of debris flow using multiple types of parameters: A Case Study in Pinggu District of Beijing, China
Source: Copernicus journal article supplement (doi:10.5194/nhess-2021-254), 2021-09-20
Supplement: Supplementary file [file nhess-2021-254-RC2-supplement.pdf]

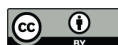

1 GIS-models with fuzzy logic for Susceptibility Maps of debris flow using multiple types of parameters: A Case  
 2 Study in Pinggu District of Beijing, China  
 3 Yiwei Zhang<sup>1</sup>, Jianping Chen<sup>1,\*</sup>, Qing Wing<sup>1</sup>, Chun Tan<sup>2,3</sup>, Yongchao Li<sup>4,5,6</sup>, Xiaohui Sun<sup>7</sup>, Yang Li<sup>8</sup>  
 4  
 5 1 College of Construction Engineering, Jilin University, Changchun 130026, China  
 6 2 China Water Northeastern Investigation, Design and Research Co., Ltd, Changchun, Jilin 130026, China  
 7 3 North China Power Engineering Co., Ltd. of China Power Engineering Consulting Group, Changchun, Jilin  
 8 130000, China  
 9 4 Key Laboratory of Shale Gas and Geoengineering, Institute of Geology and Geophysics, Chinese Academy of  
 10 Sciences, China.  
 11 5 University of Chinese Academy of Sciences.  
 12 6 Innovation Academy for Earth Science, Chinese Academy of Sciences, China.  
 13 7 Department of Earth Sciences and Engineering, Taiyuan University of Technology, Taiyuan 030024, China  
 14 8 Beijing institute of geological and prospecting engineering, Beijing 100020, China  
 15 \* Corresponding author. Tel.: +86 13843047952  
 16 \* Email address: chenjp@jlu.edu.cn

# Abstract

Debris flow is one of the main causes of life loss and infrastructure damage in mountainous areas, so these hazards must be recognized in the early stage of land development planning. According to field investigation and expert experience, a scientific and effective quantitative susceptibility assessment model was established in Pinggu District of Beijing. This model is based on Geographic Information System (GIS), combining with grey relational method, data-driven and fuzzy logic methods. The inherent influence factors, which are divided into two categories, are selected in the model consistent with the system characteristics of debris flow gully and some new factors are proposed. The results of the 17 models are verified by the results published by the authority, and validated by the other two indexes as well as Area Under Curve (AUC). Through the comparison and analysis of the results, the method to optimize is proposed, including reasonable application of field investigation and expert experience, simplification of factors and scientific classification. Finally, the final optimal susceptibility map with full discussion has the potential to help in determining regional-scale land use planning and debris flow hazard mitigation for decision makers, with full use of insufficient data, scientific calculation, and reliable results. The model has advantages in economically backward areas with insufficient data in mountainous areas.

Key words: debris flow; susceptibility assessment; fuzzy logic; model optimization; hazard mitigation

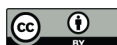

## 35 1 Introduction

36 Debris flows are processes of rapid transport of water and soil materials in mountain watersheds, with sudden  
37 and destructive outbreaks(Di et al. 2019). Some debris flows can often cause devastating disasters and huge  
38 losses(Zhang et al. 2021) and seriously threaten the lives and properties of the people in the mountains, the safety  
39 of major projects, and restrict social and economic development (Hu et al. 2011; Hungr et al. 2005; Iverson 1997;  
40 Takahashi 2014; Wu et al. 2019). Mass movements in Beijing range in scale from shallow slope failures and  
41 rockfalls to catastrophic rock avalanches frequently mobilize to form debris flows, threatening the ecological  
42 environment of the mountainous area (Zhong et al. 2004). Especially, in recent years, due to the superposition of  
43 extreme rainstorm weather and human engineering activities, debris flow events have increased gradually(Li et al.  
44 2021b). Besides, as the capital of China, Beijing has strong influence and radiation at home and abroad, where  
45 geological disasters are widely concerned (Li et al. 2020a; Xie et al. 2004). With the deepening understanding of  
46 debris flow disaster and the updating of database, a new and more accurate evaluation is also very necessary.  
47 Therefore, it is of great significance to establishing accurate and scientific debris flow susceptibility map.

48 Through previous studies, it can be summarized that the current research on debris flow mainly focuses on the  
49 following aspects: study on mechanism of debris flow, study on early warning and prediction of debris flow, study  
50 on numerical simulation of debris flow and study on debris flow hazard analysis. Especially, studies on debris flow  
51 hazard analysis have raised the attention of the researchers as soon as it appears(Dong et al. 2009). Communicating  
52 information about debris flow hazard analysis is a crucial component of preparedness and hazard mitigation(Chiou  
53 et al. 2015). Susceptibility assessment, an important part of a hazard assessment of geological processes is more  
54 flexible(Li et al. 2021a). In the early days, the susceptibility assessment of debris flows was mainly qualitative  
55 research. In 1976, the United Nations commissioned the International Union of Engineering Geology to conduct a  
56 risk assessment of debris flows, which marked the beginning of research on the susceptibility assessment of debris  
57 flows as an important research direction for disaster prevention and prediction (Li et al. 2020b). Many methods and  
58 techniques (Li et al. 2020b; Wu et al. 2019) have been proposed to evaluate debris flow susceptibility assessment  
59 based on different qualitative and quantitative approaches and geo-environmental information (Liu and Wang  
60 1995).

61 The economy in mountainous areas is often backward, we cannot supervise and verify every basin due to the  
62 limited funds. Surely, they are also wasteful and unnecessary. The debris flow susceptibility assessment can give  
63 decision makers a basis for rational allocation of resources, and determine which gullies should be focused on. In  
64 other words, the study plays a link role for other studies. Recently, with the development of mathematical theory,  
65 computer technology, the application of 3S, the susceptibility assessment of debris flows has been extensively and  
66 quantitatively studied(Li et al. 2020b). While due to the nonlinearity of debris flow system and the openness and  
67 complexity of geological environment, we realize that it is chaotic, with many factors affecting the system.  
68 Therefore, it is very difficult to find a unified and standard evaluation model. At present, when the information is  
69 insufficient, the field investigation and experience of experts are necessary basis. However, the experience is often  
70 subjective and needs a lot of professional experience accumulation. Therefore, it is very important to express the  
71 experience of experts objectively and easily understandably to serve decision makers. The application of fuzzy set

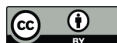

theory in GIS environments is effective for similar problems(Luo and Dimitrakopoulos 2003; Porwal et al. 2006).  
 According to the summary above, the primary object of my present study is to explore a geographic  
 information system(GIS)-based quantitative model based on expert experience and field investigation. And the  
 model is consistent with the system characteristics of debris flow gully and can also indicate the characteristics of  
 disaster chain and that the geomorphic evolution of basin rather than simple data fitting(Porwal et al. 2006).

## 2 Study area

The study area is located on the northeast of Beijing, China (Fig. 1), with a total area of 948.24 square  
 kilometers. The terrain of Pinggu is high in the northeast and low in the southwest. It is surrounded by mountains,  
 account for about two-thirds of the total area, on three sides in the southeast and north. The central and southern  
 parts are alluvial plains. The area , geologically, is the West extension of the famous Jixian section, whose bedrock  
 is mainly Middle and Late Proterozoic dolomite(Lü et al. 2017) .With Pinggu District of Beijing taken as the  
 research object, the following reasons are considered: First of all, geological hazards frequently influence human  
 economic activities, so political factors must be taken into account. And within the administrative region,  
 inconsistent decision-making can be effectively avoided. Next, the regional boundary is basically divided by ridge  
 line and stream line, and the regional geological environment is relatively uniform; Last but not the least, the  
 relationship between the precision of the base map and the size of the study area is also relatively reasonable.

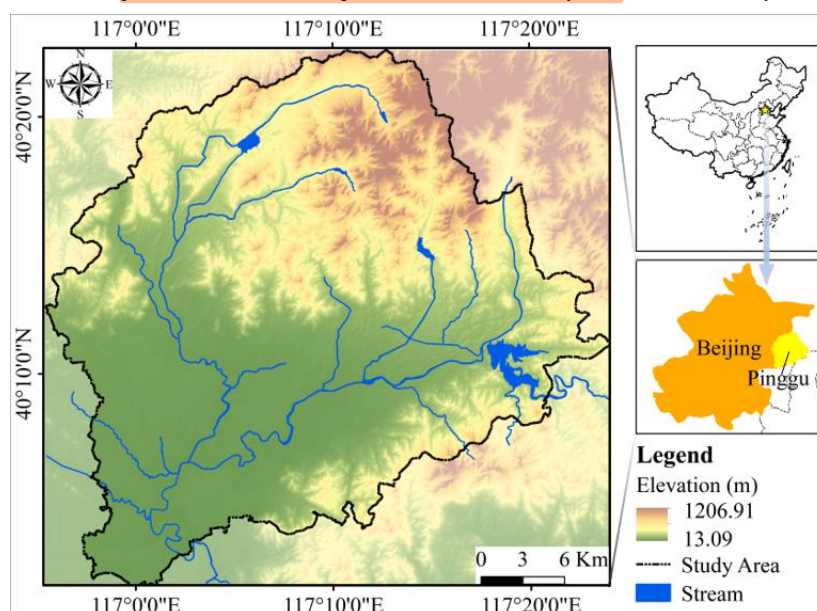

Fig. 1 Study area

## 1. Data and Methodology

In this study, the susceptibility assessment of debris flow hazard was based on the drainage basins unit. In a  
 debris flow susceptibility assessment model, hydro-logical response unit can fully represent the hydrological  
 process of hillside and will make the results more meaningful(Khan et al. 2013; Khan et al. 2016; Zou et al. 2019).

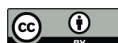

Therefore drainage networks were extracted from the ASTER-DEM by using the ArcGIS ArcHydro Toolbox and regions without obvious watershed characteristics are directly deleted. Then for each drainage basin, 19 controlling and triggering factors divided into two types were calculated. In addition, for these factors have different characteristics, different methods are used to calculate the fuzzy membership for different type factors. Because the field survey data are based on the watershed, it is scientific to make full use of qualitative understanding to determine the weight of the parameters of watershed characteristics factors; while geology and geomorphology factors are independent of watershed characteristics, it is suitable to use statistical methods to determine the objective weight. Finally, the debris flow susceptibility index (DFSI) map was derived by overlaying the factor thematic layers with fuzzy logic method. The workflow of debris flow susceptibility assessment is showed in Fig.2. Throughout the modeling process, our primary assumption here are as follows: First, while local properties surely affect the timing, size, and behavior of a mass movement, the dominant control on where they occur is the local surface topography, as it in turn defines local slope and shallow subsurface flow convergence; Second, all the evaluated basins have the possibility of debris flow; Thirdly, each evaluation factors should be available for all basins, otherwise, it should be excluded; Finally, the model should also need to integrate the system characteristics of debris flow disaster, the future development trend of climate change, and the social demand under the theoretical background of the new era to carry out reasonable modeling.

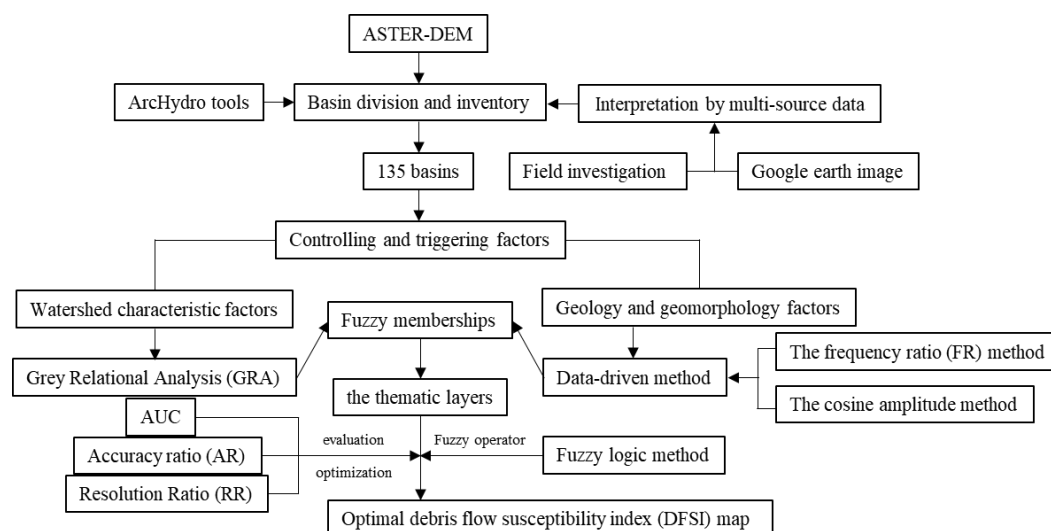

Fig.2 Workflow of debris flow susceptibility assessment

### 3.1 Debris flow basin division and inventory

There are many geological hazard points in mountainous area, so it is not realistic to monitor them completely by professional team. According to the monitoring and preventing staff and the villagers, the detailed field investigation (Fig.3) for the evidence collection of debris flows will be carried out at the reported disaster point, aiming at record the loose material, delineating the basin and exploring other important information of the debris flow gullies. Moreover, field investigation is also very important for model modification. Then based on the Hydrology module in ArcGIS 10.2, the research object can be determined. Compared with grid unit and slope unit,



119 hydrological response unit for susceptibility of debris flow has greater advantages(Li et al. 2021b; Zou et al. 2019).  
 120 Finally, 135 basins are divided after removing the flat and irregular areas (Fig. 4), referring to the result of the field  
 121 investigation and the remote sensing image. In the 135 basins, 48 basins were investigated on field, accounting for  
 122 36%.

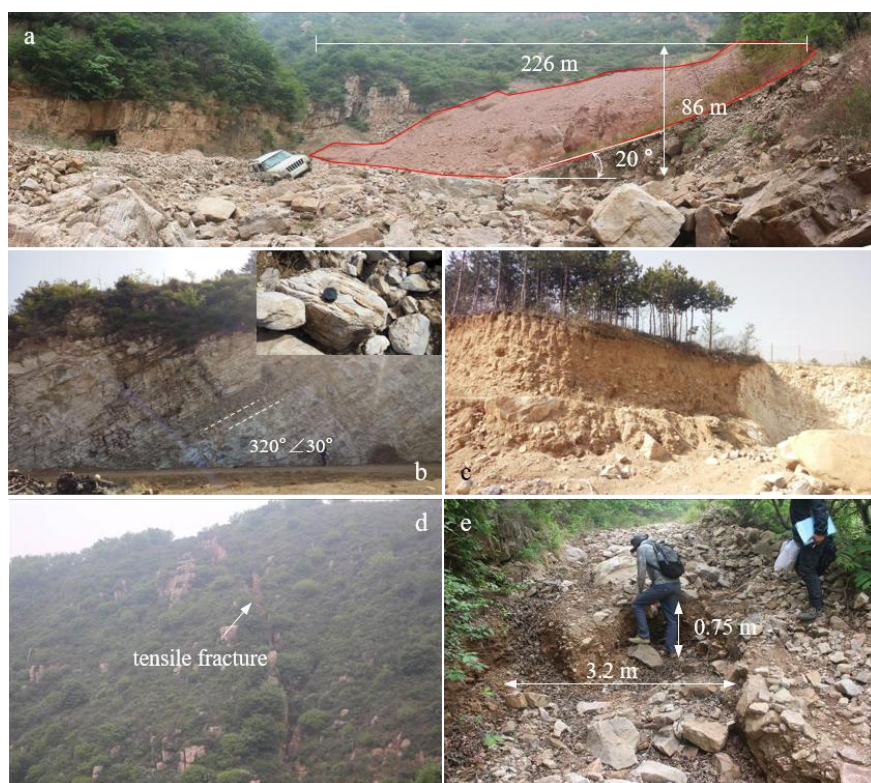

123  
 124 Fig.3 Field investigation photos. **a** Loose material; **b** Middle and Late Proterozoic dolomite; **c** colluvium deposit; **d**  
 125 Slope fracture; **e** Channel erosion phenomenon  
 126



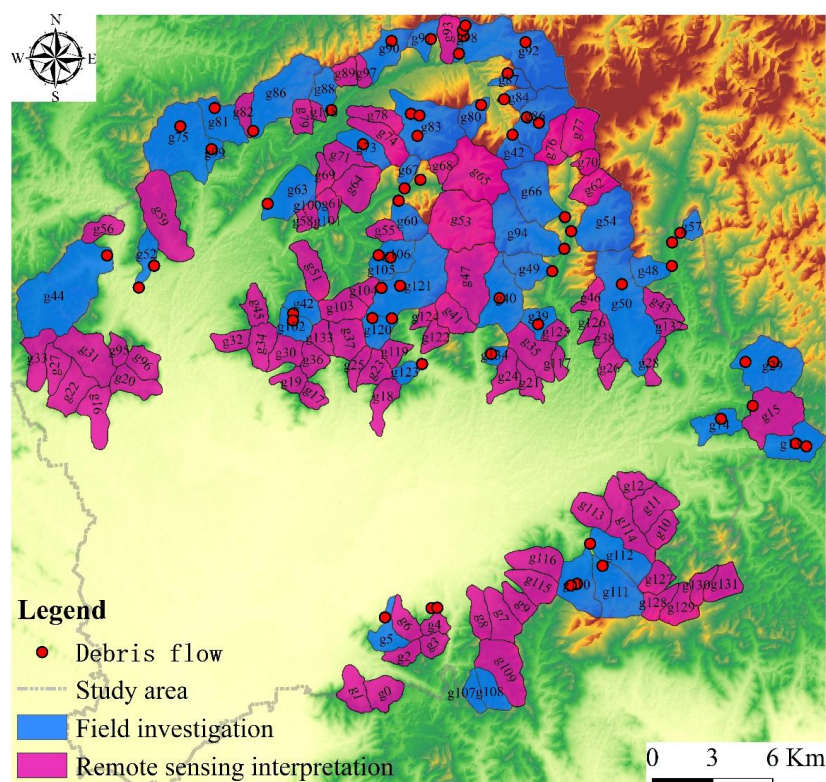

Fig. 4 Debris flow basin division and inventory.

Note: The data of debris flow points comes from Beijing Municipal Commission of Planning and Natural Resources websites ([http://ghzrzyw.beijing.gov.cn/zhengwuxinxi/zxzt/dzzhfztt/zzzhdcpg/202008/t20200807\\_1976436.html](http://ghzrzyw.beijing.gov.cn/zhengwuxinxi/zxzt/dzzhfztt/zzzhdcpg/202008/t20200807_1976436.html))

### 3.2 Debris flow controlling and triggering factors

The basic requirement for the assessment of debris flows is that at least some factors included are easily obtainable, are meaningful for susceptibility assessment, and can be used for evaluating the need for passive or active debris flow mitigation. According to previous studies, 19 factors are selected in this paper in this study. The factors are divided into two types (Table 1) because of their different characteristics. Watershed characteristic factors (Type A) can be directly quantified, once the basin is determined (Fig. 5). The influence of these parameters is bounded by the watershed; Geology and geomorphology factors (Type B) factors need to be further processed, even if the watershed is determined. The scope of these parameters is independent of the watershed boundary. Besides, rainfall and total amount of loose material source are also very important influencing factors. But according to the Beijing hydrological manual, the rainfall change in the study area is not obvious, so it is not considered in my model. And the total amount of loose material source cannot be obtained for the watershed without on-site investigation, so calculations are impossible. In fact, we indirectly consider the influence of natural loose material source by evaluating geological conditions, but cannot consider the impact of human activities.



148

149 Table 1 Factors for susceptibility assessment

| Factors and Description                    |                 |                                                                                | Significance                                                                                                                                                                                                                     | obtaining ways                                                         |
|--------------------------------------------|-----------------|--------------------------------------------------------------------------------|----------------------------------------------------------------------------------------------------------------------------------------------------------------------------------------------------------------------------------|------------------------------------------------------------------------|
| Watershed characteristic factors (Type A)  | A <sub>1</sub>  | The planimetric (projected) area of the catchment                              | Geometric parameter; affecting the accumulative total volume of water and representing the potential magnitude(Cao et al. 2016; Chang and Chien 2007; Zhang et al. 2011)                                                         | derived from DEM                                                       |
|                                            | A <sub>2</sub>  | The curved surface area of the catchment                                       | Real contact area between rainfall and basin                                                                                                                                                                                     | derived from DEM                                                       |
|                                            | A <sub>3</sub>  | The surface roughness of the catchment                                         | Dimensionless parameters, reflecting the fragmentation degrees of the surface and the ground surface micro-topography. Wu et al. (2019) believe the factor can further reflects the ability of the earth to resist wind erosion. | Calculated by $A_3=A_2 / A_1$                                          |
|                                            | A <sub>4</sub>  | The perimeter of catchment                                                     | Geometric parameter, controlling the boundaries of a watershed                                                                                                                                                                   | derived from DEM                                                       |
|                                            | A <sub>5</sub>  | Form factor                                                                    | Hydrologic parameter, related to the distribution of flow rate hydrograph(Chang and Chien 2007)                                                                                                                                  | Calculated by $A_5 = \frac{A_4}{2\sqrt{\pi A_1}}$                      |
|                                            | A <sub>6</sub>  | The curve length of the main channel                                           | Importance for the travel distance of materials and affecting the potential of erosive agents to dislodge and transport materials(Gómez and Kavzoglu 2005)                                                                       | derived from DEM                                                       |
|                                            | A <sub>7</sub>  | The straight length of the main channel                                        | Geometric parameter, representing the change of material source in space                                                                                                                                                         | derived from DEM                                                       |
|                                            | A <sub>8</sub>  | Bending coefficient of the main channel                                        | Affecting the discharge situation of debris flows(Li et al. 2020b; Zhang et al. 2013)                                                                                                                                            | Calculated by $A_8=A_6/A_7$                                            |
|                                            | A <sub>9</sub>  | The gradient of the main channel                                               | Hydraulic gradient parameter, affecting water transport capacity                                                                                                                                                                 | Calculated by $A_9=A_{12}/A_6$                                         |
|                                            | A <sub>10</sub> | Maximum elevation in the catchment                                             | Affecting vegetation and bedrock exposure                                                                                                                                                                                        | derived from DEM                                                       |
|                                            | A <sub>11</sub> | Minimum elevation in the catchment                                             | Affecting vegetation and bedrock exposure slightly                                                                                                                                                                               | derived from DEM                                                       |
|                                            | A <sub>12</sub> | Maximum relative relief in the catchment                                       | The higher the value of A <sub>12</sub> is, the large relative relief provides favorable terrain conditions for the initiation of the debris flow source.                                                                        | Calculated by $A_{12}=A_{10}-A_{11}$                                   |
|                                            | A <sub>13</sub> | Basin volume: the volume above the level of the minimum elevation in the basin | Representing the maximum material source that can be produced in an ideal state, loose material volume                                                                                                                           | derived from DEM                                                       |
|                                            | A <sub>14</sub> | Drainage density                                                               | Representing the geological structure, lithology, and the degree of rock weathering comprehensively and affecting the range of lateral erosions and retrogressive(Cao et al. 2016; Zhang et al. 2011)                            | the ratio of the total length of river network lines to A <sub>1</sub> |
| Geology and geomorphology factors (Type B) | B <sub>1</sub>  | Lithology                                                                      | Affecting the rock mass shear strength and permeability (Donati and Turrini 2002)                                                                                                                                                | derived from 1:50,000 <del>numerical</del> geological maps             |
|                                            | B <sub>2</sub>  | Proximity to faults                                                            | correlated with slope failures by generally reducing the strength of the rock mass                                                                                                                                               | derived from 1:50,000                                                  |



|                |                 |                                                                                                                                                                                                                                                                                                            |                           |
|----------------|-----------------|------------------------------------------------------------------------------------------------------------------------------------------------------------------------------------------------------------------------------------------------------------------------------------------------------------|---------------------------|
|                |                 | (Dramis and Sorriso-Valvo 1994; Kellogg 2001; Korup 2004; Kritikos and Davies 2015).                                                                                                                                                                                                                       | numerical geological maps |
| B <sub>3</sub> | Slope (degrees) | correlated with the probability of landslide occurrence (Dai and Lee 2002; He and Beighley 2008; Lee and Choi 2004). The greater the slope, the greater the vertical component of gravity (Donati and Turrini 2002), and the higher frequency of slope failures (Lee and Sambath 2006; Lee and Talib 2005) | derived from DEM          |
| B <sub>4</sub> | Slope aspect    | affecting slope instability directly or indirectly, as a result of drying winds, sunlight, rainfall and vegetation (Dai and Lee 2002; Dai et al. 2001).                                                                                                                                                    | derived from DEM          |
| B <sub>5</sub> | Curvature       | Affecting slope stability. While Lee and Talib (2005) and Ohlmacher (2007) argue on how curvature affect slope stability.                                                                                                                                                                                  | derived from DEM          |

Note: The geological maps are provided by Beijing institute of geological and prospecting engineering and the digital elevation model-(DEM) of study area are from SRTM-DEM with a solution. of 30 m ([http://gdex. cr. usgs. gov/gdex/](http://gdex.cr.usgs.gov/gdex/)).

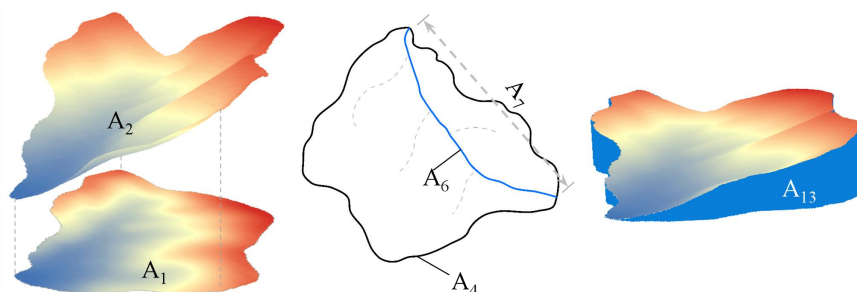

Fig. 5 Graphical illustration of some Type A factors.  $A_1$  is the planimetric (projected) area of the catchment;  $A_2$  is the curved surface area of the catchment;  $A_4$  is the the perimeter of catchment;  $A_6$  is the curve length of the main channel;  $A_7$  is the straight length of the main channel;  $A_{13}$  is basin volume

### 3.3 Fuzzy logic in susceptibility modelling

Fuzzy set theory proposed by Zadeh (1965) is a effective method to express the concept of partial set membership degree. This concept is different from the classical binary (two-valued) logic by using fuzzy descriptions such as low, moderate, high, steep, favourable and close to (Kritikos and Davies 2015). In the theory of fuzzy sets, elements have different degrees of membership in the interval [0,1]. 1 represents complete membership, and 0 represents non membership. Ross (1995) showed that fuzzy systems are useful in two general situations (Kritikos and Davies 2015). The method is very consistent with the characteristics of debris flow system, whose predisposing factors are fuzzy in nature and mechanism is complex and not fully understood. Application of fuzzy logic method, the most critical step is to find the suitable fuzzy membership of the factor. And fuzzy membership degree is equivalent to the weight in expert scoring method, which is calculated by objective method rather than given subjectively.





### 3.4 fuzzy memberships

#### 3.4.1 Grey Relational Analysis (GRA) in susceptibility modeling

GRA is proposed by Deng (1982) and it is an important part of grey system theory (Wang et al. 2014). Comparing with mathematical statistics methods which need lots of sample data, typical probability distribution and large calculation, GRA is applicable to small sample size and whether the data is regular or not. There will be no inconsistency between qualitative analysis and quantitative analysis (Deng 1988). Besides it is to excavate the leading and potential factors that affect the development of the system, and quantitatively describe the development and change trend of the system by studying whether the relative change trend of the grey factor variables with complex relationship is consistent in the process of system development and evolution (Liu et al. 2004). Thus, grey correlation analysis is introduced to quantify the correlation between each factor and the evaluation results according to field investigation expert experience. First, the procedure of GRA is to translate the performance of every alternative into a comparability sequence (Kuo et al. 2008; Lin and Lin 2002; Wei et al. 2017). Therefore, according to technical standard, “Specification of geological investigation for debris flow stabilization (DZ/T0220-2006)”, published by the China Ministry of Lands and Resources, the preliminary assessment results of debris flow susceptibility are obtained, which are used as the reference sequence of grey relation method (Table 2). Second, the grey correlation coefficient of all A factors is calculated by Eq. (1). Finally, the average grey relational coefficient (the correlation degree) is calculated by Eq. (2) as the fuzzy memberships (Table 3).

$$\xi_i(k) = \frac{\min_k \min_i |x_0(k) - x_i(k)| + 0.5 \max_k \max_i |x_0(k) - x_i(k)|}{|x_0(k) - x_i(k)| + 0.5 \min_k \min_i |x_0(k) - x_i(k)|} \quad (1)$$

Where  $\xi_i(k)$  is the grey relational coefficient,  $i=1, 2, \dots, n$  are the number  $i$  type A factors,  $k=1, 2, \dots, n$  are the numbers of basin,  $x_0(k)$  is the reference sequence (ideal target sequence),  $x_i(k)$  is the number  $i$  type A factor sequence

$$r_i = \frac{1}{N} \sum_{k=1}^n \xi_i(k) \quad (2)$$

Where  $r_i$  is the correlation degree in the range (0,1).  $N$  is the total number of basins in Table 2

Table 2 Quantitative evaluation grade standard table for Debris flow susceptibility

|       |      |      |      |      |      |      |      |      |      |      |      |      |      |
|-------|------|------|------|------|------|------|------|------|------|------|------|------|------|
| gully | g5   | g13  | g14  | g29  | g39  | g40  | g42  | g44  | g48  | g49  | g50  | g52  | g54  |
| score | 59   | 54   | 50   | 63   | 61   | 66   | 55   | 65   | 78   | 69   | 85   | 46   | 70   |
| gully | g57  | g60  | g63  | g66  | g67  | g72  | g73  | g75  | g80  | g81  | g83  | g84  | g85  |
| score | 56   | 63   | 58   | 73   | 62   | 84   | 62   | 67   | 84   | 69   | 80   | 75   | 86   |
| gully | g86  | g87  | g88  | g90  | g91  | g92  | g94  | g98  | g99  | g101 | g102 | g105 | g106 |
| score | 73   | 84   | 60   | 70   | 80   | 84   | 71   | 78   | 61   | 65   | 67   | 65   | 70   |
| gully | g107 | g108 | g110 | g111 | g112 | g120 | g121 | g123 | g134 | -    | -    | -    | -    |
| score | 45   | 45   | 69   | 69   | 74   | 62   | 63   | 73   | 56   | -    | -    | -    | -    |

Note: (130 ≥ score ≥ 116, VH), (115 ≥ score ≥ 87, M), (86 ≥ score ≥ 44, L), (43 ≥ score ≥ 15, N)  
 VH=very high susceptibility, M=moderate susceptibility, L=low susceptibility, N= Non-debris flow

Table 3 The fuzzy memberships of type A factors

|                  |                |                |                 |                 |                 |                 |                 |
|------------------|----------------|----------------|-----------------|-----------------|-----------------|-----------------|-----------------|
| Factor           | A <sub>1</sub> | A <sub>2</sub> | A <sub>3</sub>  | A <sub>4</sub>  | A <sub>5</sub>  | A <sub>6</sub>  | A <sub>7</sub>  |
| Fuzzy membership | 0.77           | 0.77           | 0.63            | 0.6             | 0.54            | 0.55            | 0.67            |
| Factor           | A <sub>8</sub> | A <sub>9</sub> | A <sub>10</sub> | A <sub>11</sub> | A <sub>12</sub> | A <sub>13</sub> | A <sub>14</sub> |
| Fuzzy membership | 0.71           | 0.55           | 0.55            | 0.59            | 0.61            | 0.79            | 0.54            |

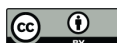

196 It can be seen from the results that the occurrence of debris flow is highly correlated with basin volume, basin area  
 197 and main gully bending coefficient with fuzzy membership above 0.7 in Beijing area. In the case of sufficient  
 198 rainfall, the basin directly determines the total amount of catchment, and the bending coefficient reflects the  
 199 replenishment of the source along the river. The basin volume is closely related to the number of supplementary  
 200 sources. Therefore, it is necessary to do well in rainfall monitoring and early warning in large watersheds, check for  
 201 loose matter accumulation in river basins before rainy season, and pay attention to slope protection of basin with  
 202 large volume potential energy for the purpose of disaster prevention and reduction.

### 203 3.4.2 Data-driven method in susceptibility modeling

204 Without regard to the influence of human activities, landslide is one of the main fixed sources of debris flow in  
 205 mountainous area. Shallow landslides are one of the most common categories of landslides. They frequently  
 206 involve large areas and different soils in various climatic zones (Benda and Dunne 1987; Borrelli et al. 2014; Selby  
 207 1982). Great debris flows may result from numerous, small slope failures that subsequently coalesce (Fairchild  
 208 1987; Roeloffs 1996), from flow enlargement due to incorporation of bed and bank debris (Bovis and Dagg 1992;  
 209 Pierson et al. 1990), or from large, individual landslides that mobilize partially or almost totally (Iverson et al. 1997;  
 210 Vallance and Scott 1997). Debris flows may also scour steep channels to bedrock and accelerate sediment delivery  
 211 to downstream, lower-gradient channels. The spatial and temporal distribution of shallow landslides are important  
 212 controls on landscape evolution and a major component of both natural and management-related disturbance  
 213 regimes in mountain drainage basins (Benda 1987; Crozier et al. 1990; Dietrich et al. 1986; Tsukamoto et al. 1982).  
 214 Therefore, the landslide susceptibility assessment methods can be used for reference to debris flow susceptibility  
 215 assessment.

216 For type B factors which cannot be characterized by a specific number, the frequency ratio (FR) method and  
 217 the cosine amplitude method can be used to derived their fuzzy memberships. The FR ratio defined as Eq. (3).  
 218 Considering the fuzzy membership must be in the interval [0,1], the FR values of the different categories are  
 219 normalized by the largest FR value (Lee 2006; Pradhan 2010; Pradhan 2011a; Pradhan 2011b) within the same type  
 220 factor ( Table 4) in order to derive the function.

$$221 \quad FR = \frac{N_{(Di)}/N_{(Ci)}}{N_{(D)}/N_{(A)}} \quad (3)$$

222 where  $N_{(Di)}$  is the number of debris flow pixels in the category  $i$ ,  $N_{(Ci)}$  is the total number of pixels in the  
 223 category  $i$ ,  $N_{(D)}$  is total number of debris flow pixels in the study area, and  $N_{(A)}$  is the total number of pixels in the  
 224 study area.

225  
 226 The cosine amplitude method (Ross 1995) is widely used (Ercanoglu and Gokceoglu 2004; Ercanoglu and  
 227 Temiz 2011; Kanungo et al. 2009; Kanungo et al. 2006) to establish relationships among elements of two or more  
 228 datasets (Kritikos and Davies 2015). Assuming that  $n$  is the number of data samples (categories of a factor used in  
 229 the analysis) represented as an array  $X = \{x_1, x_2, \dots, x_n\}$  and that each of its elements,  $x_i$ , is a vector of length  $m$  (i.e.  
 230 the size of the raster image) and can be expressed as  $X = \{x_{i1}, x_{i2}, \dots, x_{im}\}$ , then each element of a relation  $r_{ij}$  results  
 231 from a pairwise comparison of a factor category  $x_i$  with a category of the debris flow distribution layer  $x_j$  (debris  
 232 flow or non-debris flow). The memberships can be calculated by Eq. (4):



$$r_{ij} = \frac{|\sum_{k=1}^m x_{ik} x_{jk}|}{\sqrt{(\sum_{k=1}^m x_{ik}^2)(\sum_{k=1}^m x_{jk}^2)}} \quad (4)$$

Analogy with the study of Kanungo et al. (2006), we defined the  $r_{ij}$  value for any given factor category as the ratio of the total number of debris flow pixels in the category to the square root of the product of the total number of pixels in that category and the total number of debris flow pixels in the area. Values of  $r_{ij}$  close to 1 indicate similarity whereas values close to 0 indicate dissimilarity between the two datasets (Kritikos and Davies 2015). In order to use properly, every thematic layer must have the same pixel size.

Table 4 Factor categories and their fuzzy membership degrees

| Factor              | Factor class                                          | Number of pixels | Number of pixels classified as debris flows | Frequency ratio (FR) | Normalized frequency ratio | $r_{ij}$ | Comprehensive ratio (FRR) |
|---------------------|-------------------------------------------------------|------------------|---------------------------------------------|----------------------|----------------------------|----------|---------------------------|
| Lithology           | Quaternary sediments-unconsolidated clastic sediments | 7562017          | 48190                                       | 0.026                | 0.021                      | 0.091    | 0.002                     |
|                     | Coarse-grained sediments                              | 1148321          | 21741                                       | 0.076                | 0.063                      | 0.061    | 0.004                     |
|                     | Medium-grained sediments                              | 259619           | 12013                                       | 0.186                | 0.154                      | 0.045    | 0.007                     |
|                     | Fine-grained sediments                                | 754655           | 76380                                       | 0.407                | 0.337                      | 0.114    | 0.038                     |
|                     | High-grade metamorphics                               | 986435           | 154332                                      | 0.629                | 0.522                      | 0.162    | 0.085                     |
|                     | Granitoids                                            | 725651           | 140936                                      | 0.781                | 0.648                      | 0.155    | 0.100                     |
|                     | Mafic extrusive                                       | 75495            | 16398                                       | 0.873                | 0.724                      | 0.053    | 0.038                     |
|                     | Terrigenous clastic rock                              | 3289458          | 986495                                      | 1.205                | 1.000                      | 0.41     | 0.410                     |
| proximity to faults | Limestones                                            | 8804379          | 1343754                                     | 0.614                | 0.509                      | 0.478    | 0.243                     |
|                     | <100                                                  | 1057209          | 231016                                      | 0.878                | 1.000                      | 0.198    | 0.198                     |
|                     | 100-500                                               | 3778095          | 774566                                      | 0.824                | 0.938                      | 0.363    | 0.341                     |
|                     | 500-1000                                              | 3894600          | 716963                                      | 0.740                | 0.842                      | 0.349    | 0.294                     |
|                     | 1000-2000                                             | 5707265          | 760699                                      | 0.536                | 0.610                      | 0.36     | 0.220                     |
|                     | 2000-3000                                             | 2749240          | 246925                                      | 0.361                | 0.411                      | 0.205    | 0.084                     |
| slope (degrees)     | >3000                                                 | 6421103          | 69382                                       | 0.043                | 0.049                      | 0.109    | 0.005                     |
|                     | 0-5                                                   | 9674508          | 153889                                      | 0.064                | 0.056                      | 0.162    | 0.009                     |
|                     | 5-10                                                  | 2815606          | 383198                                      | 0.547                | 0.480                      | 0.255    | 0.123                     |
|                     | 10-15                                                 | 2955913          | 521040                                      | 0.709                | 0.622                      | 0.298    | 0.185                     |
|                     | 15-20                                                 | 2879704          | 570515                                      | 0.797                | 0.699                      | 0.312    | 0.218                     |
|                     | 20-25                                                 | 2432724          | 498303                                      | 0.824                | 0.723                      | 0.291    | 0.210                     |
|                     | 25-30                                                 | 1620325          | 350686                                      | 0.870                | 0.764                      | 0.244    | 0.187                     |
|                     | 30-35                                                 | 837185           | 209574                                      | 1.007                | 0.883                      | 0.189    | 0.167                     |
|                     | 35-40                                                 | 294141           | 82000                                       | 1.121                | 0.983                      | 0.118    | 0.116                     |
|                     | 40-45                                                 | 77038            | 21133                                       | 1.103                | 0.968                      | 0.06     | 0.058                     |
| Slope aspect        | >45                                                   | 30091            | 8529                                        | 1.140                | 1.000                      | 0.038    | 0.038                     |
|                     | Flat                                                  | 380875           | 463                                         | 0.005                | 0.005                      | 0.009    | 0.000                     |
|                     | North                                                 | 2370048          | 296900                                      | 1.006                | 1.000                      | 0.318    | 0.111                     |
|                     | Northeast                                             | 2193998          | 279917                                      | 0.513                | 0.510                      | 0.218    | 0.092                     |



|           |             |          |         |       |       |       |       |
|-----------|-------------|----------|---------|-------|-------|-------|-------|
|           | East        | 2873308  | 295555  | 0.414 | 0.411 | 0.224 | 0.111 |
|           | Southeast   | 3122267  | 353489  | 0.455 | 0.453 | 0.245 | 0.108 |
|           | South       | 3219111  | 354420  | 0.443 | 0.440 | 0.246 | 0.133 |
|           | Southwest   | 3144353  | 400064  | 0.512 | 0.509 | 0.261 | 0.135 |
|           | West        | 3525895  | 436381  | 0.498 | 0.495 | 0.273 | 0.140 |
|           | Northwest   | 2787380  | 381679  | 0.551 | 0.547 | 0.255 | 0.318 |
| Curvature | Concave     | 490900   | 109157  | 0.893 | 1.000 | 0.136 | 0.136 |
|           | Lessconcave | 2037602  | 394583  | 0.778 | 0.871 | 0.259 | 0.226 |
|           | Flat        | 18364429 | 1769210 | 0.387 | 0.433 | 0.549 | 0.238 |
|           | Less convex | 2202019  | 416142  | 0.759 | 0.850 | 0.266 | 0.226 |
|           | Convex      | 522285   | 112740  | 0.867 | 0.971 | 0.139 | 0.135 |

243

### 244 3.5 DFSI map

245 To derive the debris flow susceptibility index (DFSI) map by overlaying the factor thematic layers using fuzzy  
 246 logic method, the "fuzzified" factors represented by information layers in raster format with values ranging from 0  
 247 to 1 need to be combined. Compared with other four fuzzy operator, Fuzzy Gamma (Eq.6) is more suitable for the  
 248 research (Kritikos and Davies 2015). To determine the appropriate  $\gamma$  value, the results of different gamma values  
 249 were compared by the greatest distance (Kritikos and Davies 2015) between the average DFSI curves of the debris  
 250 flows locations and non-debris flows locations (For example, flat pixels)(Fig. 6). Finally, 0.9 is determined for the  $\gamma$   
 251 value, because there is the greatest difference between debris flow and non-debris flows locations areas. In order to  
 252 illustrate the superiority of our model through comparison, seventeen results are calculated in ArcGIS (Fig. 7).

$$253 \mu_{(x)} = (1 - \prod_{i=1}^n (1 - \mu_i))^\gamma * (\prod_{i=1}^n \mu_i)^{1-\gamma} \quad (5)$$

254 where  $\mu_{(x)}$  is the combined membership value,  $\mu_i$  is the fuzzy membership function for the  $i$ th map,  $i=1,2, \dots, n$   
 255 are the numbers of thematic layers to be combined, and  $\gamma$  is a parameter in the range (0,1).

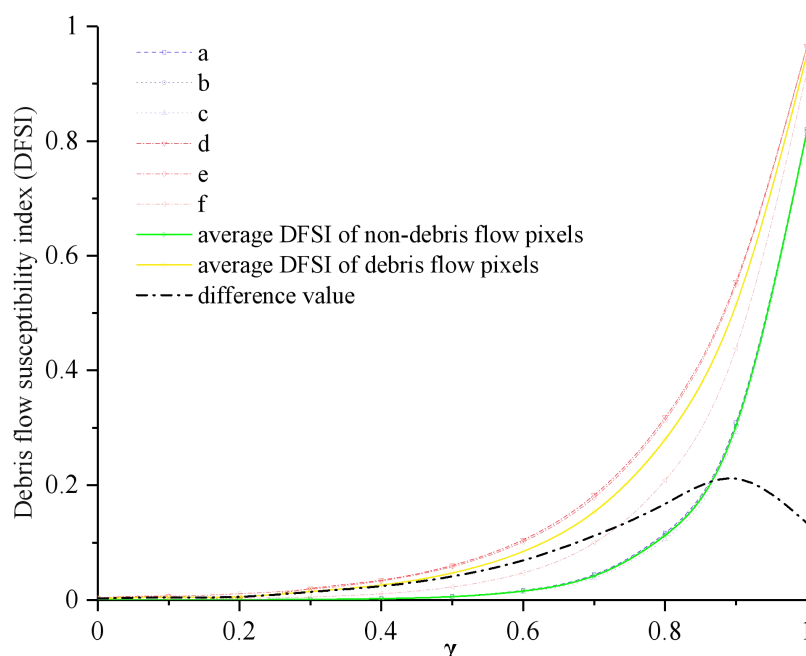

Fig. 6 Effect of  $\gamma$  value on Debris flow susceptibility index (DFSIs). Curves d, e and f correspond to debris flow pixels, and curves a, b and c correspond to non-debris flow area where a Debris flow is unlikely. According to curve i, the maximum difference between the average DFSI values is observed for  $\gamma \approx 0.9$

In order to find the optimal model, seventeen results were compared (Table 6). According to the distribution map of potential geological hazard points and susceptibility map in Pinggu District published by Beijing Municipal Commission of Planning and Natural Resources (BMCP&NR 2020), three indexes are used to verify the validity and accuracy of the model.

The results of the model are independent of the model itself, so the predictive performance of the final map is not just “the goodness of fit” of the data (Chung et al. 1995; Remondo et al. 2003). A relatively reliable technique for quantitatively assessing how well a model is the construction of validation or success rate curves (Chung and Fabbri 1999; Frattini et al. 2010; Remondo et al. 2003; Westen et al. 2003) based on a comparison between the spatial distribution of debris flows and modelled debris flow susceptibility. The curves illustrate the debris flow recorded in the area with respect to susceptibility values also expressed as cumulative percentages of the total area. The area under the curve (AUC) defines the success rate (Marjanović et al. 2011). Generally, AUC values above 0.7 indicate model performance can be acceptable, while below 0.7, the performance is considered poor (Kritikos and Davies 2015).

Although AUC is an effective evaluation method, the results is not comprehensive as mathematical features for selecting the best measurement model because of insufficiency data for validation. In order to ensure the objectivity of the results, we can only effectively use the recorded debris flow gully as positive, while the others as negative. Thus, a two-category test is proposed to verify the model in this paper. First, the DFSI map of each model are divided into two categories by Natural Breaks (Jenks) method (Fig. 7). Then the accuracy ratio (AR) is defined





as the frequency of the number of debris flow both classified by model and simultaneously recorded in site to the number of debris flow recorded in site. The Resolution Ratio (RR) is defined as the number of debris flow classified by model and simultaneously recorded in site to the total number debris flow classified by the model (in red color). Take  $R_4$  for example, there are total 135 basin in the research area, but only 46 records of debris flows (Fig.3). And in the results of two categories by Natural Breaks (Jenks) method, 20 basins are divided in to debris flow, while there are only 14 debris flows among them. Then AR is calculated by dividing 14 into 46 and RR was calculated by dividing 14 into 20.

The higher the two values, the better the susceptibility map. Finally, the performance of models (P value) can be obtained by the Eq. (6). AUC values less than 0.6 are directly eliminated. Comparing the results of rest models, the result of  $R_{16}$  is optimal, and the results of DFSI map are in good agreement with those of field investigation (Fig. 8).

$$P = AUC + \sqrt{(AR * RR)} \quad (6)$$

Table 5 Predictive performance of different models

| Result and Description                                                                      |          |                                                | AUC   | Two-category test   |                       | Performance index (centesimal grade) |
|---------------------------------------------------------------------------------------------|----------|------------------------------------------------|-------|---------------------|-----------------------|--------------------------------------|
|                                                                                             |          |                                                |       | Accuracy Ratio (AR) | Resolution Ratio (RR) |                                      |
| A factors only or B factors only                                                            | $R_1$    | B factors with $r_{ij}$                        | 0.460 | /                   | /                     | /                                    |
|                                                                                             | $R_2$    | B factors with FR                              | 0.687 | /                   | /                     | /                                    |
|                                                                                             | $R_3$    | B factors with FRR                             | 0.602 | /                   | /                     | /                                    |
|                                                                                             | $R_4$    | All A factors                                  | 0.786 | 0.304               | 0.700                 | 83                                   |
|                                                                                             | $R_5$    | Selected A factors                             | 0.760 | 0.391               | 0.750                 | 94                                   |
| All factors as a single thematic layer                                                      | $R_6$    | All A factors and B factors with $r_{ij}$      | 0.776 | 0.261               | 0.667                 | 74                                   |
|                                                                                             | $R_7$    | All A factors and B factors with FR            | 0.779 | 0.283               | 0.684                 | 78                                   |
|                                                                                             | $R_8$    | All A factors and B factors with FRR           | 0.753 | 0.326               | 0.600                 | 76                                   |
|                                                                                             | $R_9$    | Selected A factors and B factors with $r_{ij}$ | 0.746 | 0.348               | 0.727                 | 86                                   |
|                                                                                             | $R_{10}$ | Selected A factors B factors with FR           | 0.761 | 0.348               | 0.727                 | 87                                   |
|                                                                                             | $R_{11}$ | Selected A factors B factors with FRR          | 0.740 | 0.348               | 0.727                 | 85                                   |
| A factors combined into one thematic layers, B factor combined into another thematic layers | $R_{12}$ | All A factors and B factors with $r_{ij}$      | 0.708 | 0.5                 | 0.511                 | 82                                   |
|                                                                                             | $R_{13}$ | All A factors and B factors with FR            | 0.753 | 0.848               | 0.394                 | 99                                   |
|                                                                                             | $R_{14}$ | All A factors and B factors with FRR           | 0.711 | 0.870               | 0.404                 | 96                                   |
|                                                                                             | $R_{15}$ | Selected A factors and B factors with $r_{ij}$ | 0.726 | 0.348               | 0.667                 | 80                                   |
|                                                                                             | $R_{16}$ | Selected A factors and B factors with FR       | 0.768 | 0.739               | 0.442                 | 100                                  |
|                                                                                             | $R_{17}$ | Selected A factors B factors with FRR          | 0.740 | 0.457               | 0.600                 | 88                                   |

Note: Selected A factors with fuzzy membership more than 0.6; FRR represents the product of FR and  $r_{ij}$ ; Performance index is normalized by the largest FR value



294

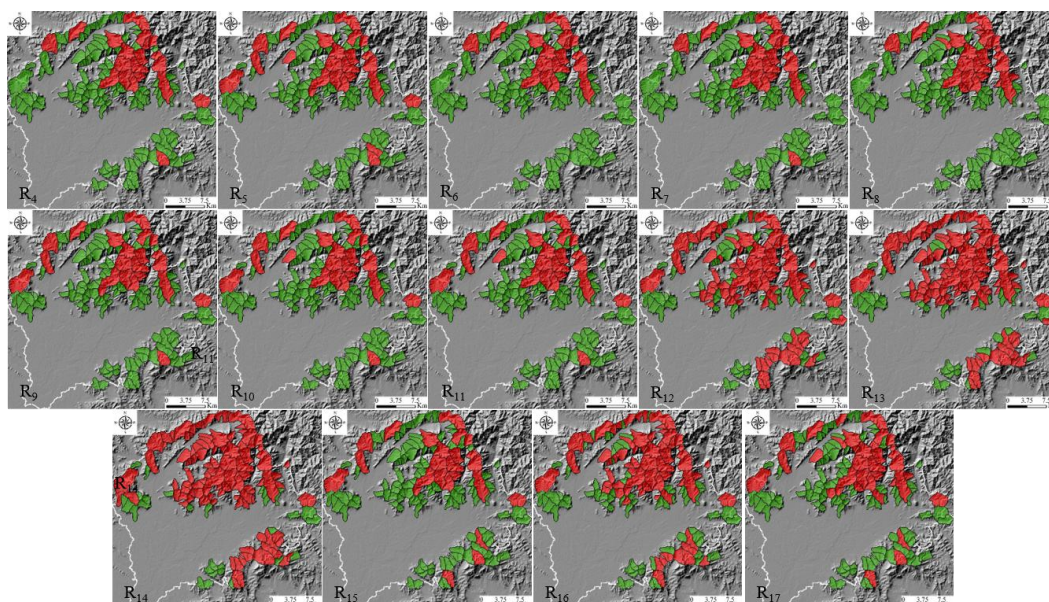

295  
 296

Fig.7 Results of two categories by Natural Breaks (Jenks) method

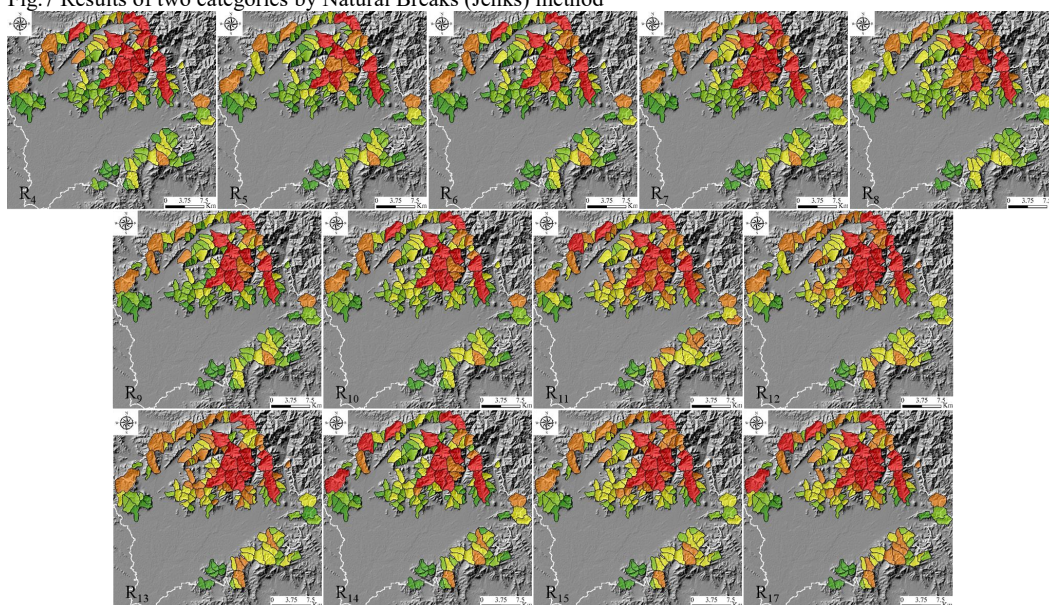

297



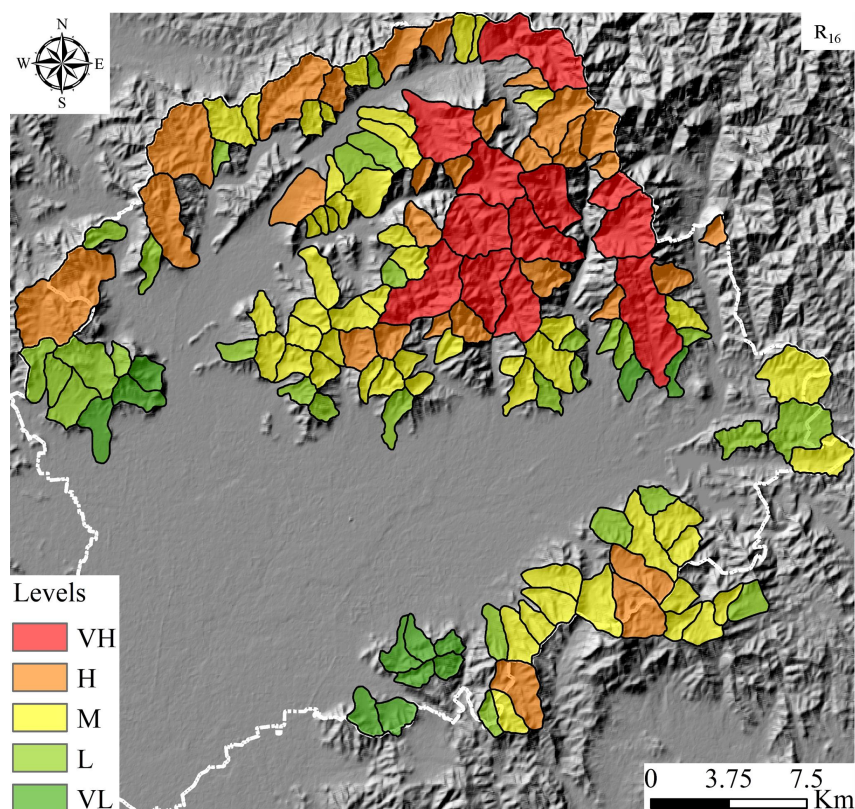

298  
 299 Fig 8 Debris flow susceptibility maps

#### 300 4 Results and Discussion

301 According to the previous researches, 19 factors are selected. Although these factors cannot fully evaluate the  
 302 character of a basin, it is necessary to consider that they are easily obtainable for each basin and can be obtained  
 303 relatively accurately, ensuring that the model can be widely applied. Vegetation and rainfall factors are also very  
 304 important, but there is little difference in vegetation and rainfall across the study area. Considering the background  
 305 of global climate change, high temperature and extreme rainfall events will be increasing, which also makes them  
 306 uncertain factor compared with factors compared. As for the factors describing debris flow magnitude, usually,  
 307 several channels have the recorded data. Other factors that also influence the susceptibility of debris flow are  
 308 usually difficult to obtain, including soil drainage, induration, thickness, conductivity, and strength properties;  
 309 subsurface flow orientation; bedrock fracture flow; and root strength.

310 The predictive performance of the output debris flow susceptibility maps, obtained from seventeen different  
 311 models, is verified by comparing with maps published by authority. By comparing the results, the following results  
 312 are discussed:

313 First, comparing  $R_1$ ,  $R_2$ ,  $R_3$ ,  $R_4$  and  $R_5$ , it can be concluded that the model based on field investigation and  
 314 expert experience is more effective than data- driven directly, when the sufficient information cannot be obtained.  
 315 This is mainly because when the basin area reaches a certain size, it is no longer controlled by one or several



factors, but becomes a complex system. It is not only the factors that affect the system, but also the system will react on each factor. Geomorphic evolution is basically the result of the interaction of the endogenic and exogenic geological processes. A geological period can be regarded as the beginning of an endogenic geological processes to the next one. In the early stage of geological period, endogenic geological processes play a major role, and in the later relatively stable period, exogenic geological processes will play a more and more important role. In this large cycle, the basin continuously occurs a small cycle of accumulating and releasing energy, which leads to extremely complex system changes. In addition, there is a contradiction between the scale of geological evolution and the scale of engineering activities. So limited information can be obtained under these conditions that leads to the unreliability of data-driven evaluation. Therefore, in the current period, field investigation and expert experience are fundamental.

Second, by comparing  $R_4$  and  $R_5$ ,  $R_6$  and  $R_9$ ,  $R_7$  and  $R_{10}$ ,  $R_8$  and  $R_{11}$ ,  $R_{12}$  and  $R_{15}$ ,  $R_{13}$  and  $R_{16}$ ,  $R_{14}$  and  $R_{17}$ , it can be concluded that the accuracy and resolution of the model can be improved by simplifying the factors, which will eliminate the weak correlation and independence factors. In practical application, even if the susceptibility map is obtained, the classification of the susceptibility degree is still a very difficult problem. Because everyone's subjective definition of "susceptibility degree" is different. By simplifying the factors, the main factors can be selected, which magnifies the differences between basins, so the boundaries between different susceptibility degrees are more obvious.

Third, by comparing  $R_6$  and  $R_{12}$ ,  $R_7$  and  $R_{13}$ ,  $R_8$  and  $R_{14}$ ,  $R_9$  and  $R_{15}$ ,  $R_{10}$  and  $R_{16}$ ,  $R_{11}$  and  $R_{17}$ , it can be concluded that the model in which factors are classified into two types is better than the method in which all factors as a single thematic layer without classification. Because the factors categorized separately are more closely linked and has consistent influence on the system in mechanism. We can also infer that the non-linear combination characteristics between different types are stronger and scientific classification can improve the performance of the model.

Fourth, comparing  $R_{12}$  and  $R_{13}$ ,  $R_{15}$  and  $R_{16}$ , it can be concluded that the frequency ratio method is better than the cosine amplitude method in the study. Different from the study of Kritikos et al. (2015), the watershed unit rather than the grid unit is used, which indicates that the former has a wide range of application, while the latter has a disadvantage of strict conditions.

Based on the results of the above four analyses, the most optimal model should have the features of being based on expert experience, using selected factors, classifying factors before using them, and using frequency ratio method. Then the model  $R_{16}$  is selected according to the features, which is well in accordance with theoretical method performance score, and gets fine mutual verification.

In summary, the debris flow susceptibility assessment in this study follows the principles of scientific and practicality. First, classification of influencing factors follows the principles of scientific, which require the classification to be accurate and systematic. Then the same susceptibility degree can be classified into the same type reasonably. In order to correctly classify the factors, it is necessary to grasp the characteristics of the formation, movement and accumulation of debris flow. Therefore, the classification should comprehensively consider the development background (geology, geomorphology, climate, hydrology, soil, vegetation, human activities and other factors). The practical principle refers to that the study should not only fully obtain scientific and accurate results,

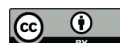

but also make the professional results understood by decision makers. The relative simplicity of the model with data easy to obtain is attractive, which can also provide necessary information for debris flow mitigation and land utilization. Although the susceptibility grade and susceptibility value of each watershed is obtained, the results are relatively effective in this study area. The purpose is to distinguish the difference of each channel for decision-making to work out pertinence measure. Once separated from this study area, the comparison with other regions in value will lose its practical significance. In addition, with the development of technology and theory, we should replace some traditional factors which are not easy to quantify with more precise quantitative factors to improve the efficiency and accuracy of evaluation, such as surface roughness instead of drainage density. Last, nonlinear methods is consistent with the nonlinear characteristics of debris flow system.

## 5 Conclusion

In the present study, a new combination model for debris-flow susceptibility based on GIS was developed in Pinggu, the eastern of Beijing. The objective and motivation of this study is to demonstrate a simple, extensible, and convenient analytical model for the debris flow prediction. Three methods are selected in the model with their own advantages. GRA has great advantages in the case of less samples, data-driven method is mainly used to reduce subjectivity and fuzzy logic is fitted to solve nonlinear problems with fuzzy classification. The output debris flow susceptibility maps obtained from the optimal models demonstrated satisfactory performance predicting approximately 50 % of the debris flow gully with the relative higher susceptibility values corresponding to  $AUC \geq 0.7$ . Considering that the data used for verification is only the recorded debris flow points rather than all debris flow records in the area, its accuracy should be higher. The predictive performance of the susceptibility maps and the spatial correlation of debris flow gully with H and VH susceptibility with recorded debris flow illustrate that the assessment at regional scale using the proposed method is feasible. Compared with the previous results based on grid units in this area, the evaluation results are basically the same, but they are more targeted for debris flow disasters for decision makers {Li, 2020 #278}. Besides, considering that the meaning of the used factors is clear and the data easy to obtain, these conditions mentioned enable the model to be widely applied.

Preliminary research indicates that: First of all, the relatively ideal evaluation results are obtained by combining the landslide susceptibility analysis method with the debris flow. It reveals a systematic idea and disaster chain phenomenon. Further more, we should pay more attention to the relative susceptibility value rather than absolute values in different models, unless we need further study such as risk assessment. It is realized that the performance of the model is, to a great extent, determined by the effect of its classification. What's more, comprehensive consideration of endogenic and exogenic geological processes in susceptibility assessment has better expected results. Last but not least, under the engineering geological environment with acceptable difference, it has advantages of practical significance to regard the administrative region as a research area for policy making. because different regions have different status constraints in population quality and economy. In short, an effort has been made to develop a cost- and time-efficient debris flow susceptibility assessment with an acceptable degree of accuracy for regional-scale planning and contribute to making hazard, susceptibility and risk maps more accessible to individuals and local authorities. The evolution of GIS-based methods and modern data availability especially through online databases significantly contribute towards this aim. However, a challenge remains in producing



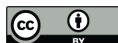

391 results with meaningful accuracy for the scale of planning, using available resources. Previous studies, as well as  
392 the present work, highlight that the effectiveness of the final map depends on the quality of input data. Comparison  
393 with a very high-resolution LIDAR-derived DEM indicated that the spatial accuracy of the DEM varies between  
394 different landforms (lakes, river channels, riverbeds, floodplains etc.) and the areas of greatest errors are  
395 predominantly confined to valley floors. However, with overall RMS error of 8.15 m, the DEM meets the  
396 internationally accepted accuracy standards as set out by US Geological Survey (USGS 1997) and is of sufficient  
397 quality for regional-scale studies such as the present one. Updating and improving existing debris flow catalogues  
398 and inventories are crucial for the development of reliable susceptibility and risk assessment methods.

#### 399 **Acknowledgements**

400 This research was financially supported by the Key Project of NSFC-Yunnan Joint Fund (Grant no. U1702241) and  
401 the National Key Research and Development Plan (Grant No. 2018YFC1505301). The authors would like to thank  
402 Yuchao Li, Zhihai Li, Jiejie Shen, Feifan Gu et al. for their contributions to the collection of field data, and the editor and  
403 anonymous reviewers for their comments and suggestions which helped a lot in making this paper better.  
404



## 405 Reference

- 406 Benda LE (1987) Sediment routing by debris flow
- 407 Benda LE, Dunne T (1987) Sediment routing by debris flow. In: Beschta RL, Blinn T, Grant GE, Swanson FJ, Ice GG (eds) Erosion  
 408 and sedimentation in the Pacific Rim, vol 165. IAHS Publ, pp 213-223. doi:doi:10.1111/j.1753-4887.1977.tb06503.x
- 409 BMCP&NR (2020) The distribution map of potential geological hazard points and susceptibility map in pinggu district.  
 410 [http://ghzrzyw.beijing.gov.cn/zhengwuxinxi/zxzt/dzzhfzzt/zzzhdcpg/202008/t20200807\\_1976436.html](http://ghzrzyw.beijing.gov.cn/zhengwuxinxi/zxzt/dzzhfzzt/zzzhdcpg/202008/t20200807_1976436.html).
- 411 Borrelli L, Cofone G, Coscarelli R, Gullà G (2014) Shallow landslides triggered by consecutive rainfall events at Catanzaro strait  
 412 (Calabria–Southern Italy) Journal of Maps 11:730-744 doi:10.1080/17445647.2014.943814
- 413 Bovis M, Dagg B (1992) Debris flow triggering by impulsive loading - mechanical modeling and case-studies Canadian Geotechnical  
 414 Journal 29:345-352 doi:10.1139/t92-040
- 415 Cao C, Xu P, Chen J, Zheng L, Niu C (2016) Hazard assessment of debris-flow along the baicha river in heshigten banner, inner  
 416 mongolia, china Int J Environ Res Public Health 14:1-19 doi:10.3390/ijerph14010030
- 417 Chang TC, Chien YH (2007) The application of genetic algorithm in debris flows prediction Environmental Geology 53:339-347  
 418 doi:10.1007/s00254-007-0649-2
- 419 Chiou IJ, Chen CH, Liu WL, Huang SM, Chang YM (2015) Methodology of disaster risk assessment for debris flows in a river basin  
 420 Stoch Env Res Risk A 29:775-792 doi:10.1007/s00477-014-0932-1
- 421 Chung C-JF, Fabbri AG (1999) Probabilistic prediction models for landslide hazard mapping Photogrammetric Engineering And  
 422 Remote Sensing 65:1389-1399 doi:10.1016/S0924-2716(99)00030-1
- 423 Chung CJF, Fabbri A, Westen CJv (1995) Multivariate regression analysis for landslide hazard zonation Geographical Information  
 424 Systems in Assessing Natural Hazards 5:107-133
- 425 Crozier MJ, Vaughan EE, Tippet JM (1990) Relative instability of colluvium-filled bedrock depressions Earth Surface Processes and  
 426 Landforms 15:329-339 doi:10.1002/esp.3290150404
- 427 Dai FC, Lee CF (2002) Landslide characteristics and slope instability modeling using GIS, Lantau Island, Hong Kong Geomorphology  
 428 42:213-228 doi:10.1016/S0169-555X(01)00087-3
- 429 Dai FC, Lee CF, Li H-Z, Xu C (2001) Assessment of landslide susceptibility on the natural terrain of Lantau Island, Hong Kong  
 430 Environmental Geology 40:381-391 doi:10.1007/s002540000163
- 431 Deng JL (1982) Control problems of grey systems Systems and Control Letters 1:288-294 doi:10.1016/S0167-6911(82)80025-X
- 432 Deng JL (1988) Grey prediction and decision. Huazhong University of Science and Technology Press, Wuhan
- 433 Di B et al. (2019) Assessing susceptibility of debris flow in southwest china using gradient boosting machine Sci Rep 9:12532  
 434 doi:10.1038/s41598-019-48986-5
- 435 Dietrich WE, Wilson CJ, Reneau SL (1986) Hollows, colluvium, and landslides in soil-mantled landscapes. In: Abrahams. AD (ed)  
 436 Hillslope Processes. Allen & Unwin, Boston,
- 437 Donati L, Turrini MC (2002) An objective method to rank the importance of the factors predisposing to landslides with the GIS  
 438 methodology: application to an area of the Apennines (Valnerina; Perugia, Italy) Engineering Geology 63:277-289  
 439 doi:10.1016/S0013-7952(01)00087-4
- 440 Dong J-J, Lee C-T, Tung Y-H, Liu C-N, Lin K-P, Lee J-F (2009) The role of the sediment budget in understanding debris flow  
 441 susceptibility Earth Surface Processes and Landforms 34:1612-1624 doi:10.1002/esp.1850
- 442 Dramis F, Sorriso-Valvo M (1994) Deep-seated gravitational slope deformations, related landslides and tectonics Engineering Geology  
 443 38:231-243 doi:10.1016/0013-7952(94)90040-X
- 444 Ercanoglu M, Gokceoglu C (2004) Use of fuzzy relations to produce landslide susceptibility map of a landslide prone area (West  
 445 Black Sea Region, Turkey) Engineering Geology 75:229-250 doi:10.1016/j.enggeo.2004.06.001
- 446 Ercanoglu M, Temiz FA (2011) Application of logistic regression and fuzzy operators to landslide susceptibility assessment in Azdavay  
 447 (Kastamonu, Turkey) Environmental Earth Sciences 64:949-964 doi:10.1007/s12665-011-0912-4
- 448 Fairchild LH (1987) The importance of lahar initiation processes Reviews in Engineering Geology 7:51-62 doi:10.1130/REG7-p51



- 449 Frattini P, Crosta G, Carrara A (2010) Techniques for evaluating the performance of landslide susceptibility models *Engineering*
- 450 *Geology* 111:62-72 doi:10.1016/j.enggeo.2009.12.004
- 451 Gómez H, Kavzoglu T (2005) Assessment of shallow landslide susceptibility using artificial neural networks in Jabonosa River Basin,
- 452 Venezuela *Engineering Geology* 78:11-27 doi:10.1016/j.enggeo.2004.10.004
- 453 He Y, Beighley RE (2008) GIS-based regional landslide susceptibility mapping: a case study in southern California *Earth Surface*
- 454 *Processes and Landforms* 33:380-393 doi:10.1002/esp.1562
- 455 Hu K, Wei F, Li Y (2011) Real-time measurement and preliminary analysis of debris-flow impact force at Jiangjia Ravine, China *Earth*
- 456 *Surface Processes and Landforms* 36:1268-1278 doi:10.1002/esp.2155
- 457 Hungr O, McDougall S, Bovis M (2005) Entrainment of material by debris flows. In: Jakob M, Hungr O (eds) *Debris-flow Hazards*
- 458 *and Related Phenomena*. Praxis.Springer Berlin Heidelberg, pp 135-158
- 459 Iverson RM (1997) The physics of debris flows *Reviews of Geophysics* 35:245-296. doi:10.1029/97RG00426
- 460 Iverson RM, Reid ME, LaHusen RG (1997) Debris-flow mobilization from landslides *Annual Review of Earth and Planetary Sciences*
- 461 25:85-138 doi:10.1146/annurev.earth.25.1.85
- 462 Kanungo DP, Arora M, Sarkar S, Gupta R (2009) A fuzzy set based approach for integration of thematic maps for landslide
- 463 susceptibility zonation *Georisk* 3 doi:10.1080/17499510802541417
- 464 Kanungo DP, Arora MK, Sarkar S, Gupta RP (2006) A comparative study of conventional, ANN black box, fuzzy and combined neural
- 465 and fuzzy weighting procedures for landslide susceptibility zonation in Darjeeling Himalayas *Engineering Geology*
- 466 85:347-366 doi:10.1016/j.enggeo.2006.03.004
- 467 Kellogg KS (2001) Tectonic controls on a large landslide complex: Williams Fork Mountains near Dillon, Colorado *Geomorphology*
- 468 41:355-368 doi:10.1016/S0169-555X(01)00067-8
- 469 Khan U, Tuteja NK, Sharma A (2013) Delineating hydrologic response units in large upland catchments and its evaluation using soil
- 470 moisture simulations *Environmental Modelling & Software* 46:142-154 doi:10.1016/j.envsoft.2013.03.005
- 471 Khan U, Tuteja NK, Sharma A, Lucas S, Murphy B, Jenkins B (2016) Applicability of Hydrologic Response Units in low topographic
- 472 relief catchments and evaluation using high resolution aerial photograph analysis *Environmental Modelling & Software*
- 473 81:56-71 doi:10.1016/j.envsoft.2016.03.010
- 474 Korup O (2004) Geomorphic implications of fault zone weakening Slope instability along the Alpine Fault South Westland to
- 475 Fiordland New Zealand *Journal of Geology and Geophysics* 47:257-267 doi:10.1080/00288306.2004.9515052
- 476 Kritikos T, Davies T (2015) Assessment of rainfall-generated shallow landslide/debris-flow susceptibility and runoff using a
- 477 GIS-based approach: application to western Southern Alps of New Zealand *Landslides* 12:1051-1075
- 478 doi:10.1007/s10346-014-0533-6
- 479 Kuo Y, Yang T, Huang G-W (2008) The use of grey relational analysis in solving multiple attribute decision-making problems
- 480 *Computers & Industrial Engineering* 55:80-93 doi:10.1016/j.cie.2007.12.002
- 481 Lee S (2006) Application and verification of fuzzy algebraic operators to landslide susceptibility mapping *Environmental Geology*
- 482 52:615-623 doi:10.1007/s00254-006-0491-y
- 483 Lee S, Choi J (2004) Landslide susceptibility mapping using GIS and the weight-of-evidence model *International Journal of*
- 484 *Geographical Information Science* 18:789-814 doi:10.1080/13658810410001702003
- 485 Lee S, Sambath T (2006) Landslide susceptibility mapping in the Damrei Romel area, Cambodia using frequency ratio and logistic
- 486 regression models *Environmental Geology* 50:847-855 doi:10.1007/s00254-006-0256-7
- 487 Lee S, Talib JA (2005) Probabilistic landslide susceptibility and factor effect analysis *Environmental Geology* 47:982-990
- 488 doi:10.1007/s00254-005-1228-z
- 489 Li Y, Chen J, Li Z, Han X, Zhai S, Li Y, Zhang Y (2021a) A case study of debris flow risk assessment and hazard range prediction
- 490 based on a neural network algorithm and finite volume shallow water flow model *Environmental Earth Sciences* 80
- 491 doi:10.1007/s12665-021-09580-z
- 492 Li Y, Chen J, Tan C, Li Y, Gu F, Zhang Y, Mehmood Q (2020a) Application of the borderline-SMOTE method in susceptibility



- 493 assessments of debris flows in Pinggu District, Beijing, China *Natural Hazards* 105:2499-2522
- 494 doi:10.1007/s11069-020-04409-7
- 495 Li Y, Chen J, Zhang Y, Song S, Han X, Ammar M (2020b) Debris flow susceptibility assessment and runout prediction: A case study in
- 496 shiyang gully, beijing, china *International Journal of Environmental Research* 14:365-383 doi:10.1007/s41742-020-00263-4
- 497 Li Z, Chen J, Tan C, Zhou X, Li Y, Han M (2021b) Debris flow susceptibility assessment based on topo-hydrological factors at
- 498 different unit scales: a case study of Mentougou district, Beijing *Environmental Earth Sciences* 80
- 499 doi:10.1007/s12665-021-09665-9
- 500 Lin CL, Lin CL (2002) The use of the orthogonal array with grey relational analysis to optimize the electrical discharge machining
- 501 process with multiple performance characteristics *International Journal of Machine Tools and Manufacture* 42:237-244
- 502 doi:10.1016/S0890-6955(01)00107-9
- 503 Liu L, Wang S (1995) Fuzzy comprehensive evaluation on landslide and debris flow risk degree in Zotong, Yunnan Mountain
- 504 Research 13:261-266
- 505 Liu S, Dang Y, Fang Z (2004) Grey system theory and its applications. Science Press, Beijing
- 506 Lü J, Wang C, Liu H, Zhang X (2017) Division of beijing geological environment system *Urban geology* 12:19-25
- 507 doi:10.3969/j.issn.1007-1903.2017.03.004
- 508 Luo X, Dimitrakopoulos R (2003) Data-driven fuzzy analysis in quantitative mineral resource assessment *Computers & Geosciences*
- 509 29:3-13 doi:10.1016/S0098-3004(02)00078-x
- 510 Marjanović M, Kovačević M, Bajat B, Voženilek V (2011) Landslide susceptibility assessment using SVM machine learning algorithm
- 511 *Engineering Geology* 123:225-234 doi:10.1016/j.enggeo.2011.09.006
- 512 Ohlmacher GC (2007) Plan curvature and landslide probability in regions dominated by earth flows and earth slides *Engineering*
- 513 *Geology* 91:117-134 doi:10.1016/j.enggeo.2007.01.005
- 514 Pierson TC, Janda RJ, Thouret J-C, Borrero CA (1990) Perturbation and melting of snow and ice by the 13 November 1985 eruption of
- 515 Nevado del Ruiz, Colombia, and consequent mobilization, flow and deposition of lahars *Journal of Volcanology and*
- 516 *Geothermal Research* 41:17-66 doi:10.1016/0377-0273(90)90082-q
- 517 Porwal A, Carranza EJM, Hale M (2006) A Hybrid Fuzzy Weights-of-Evidence Model for Mineral Potential Mapping *Natural*
- 518 *Resources Research* 15:1-14 doi:10.1007/s11053-006-9012-7
- 519 Pradhan B (2010) Landslide susceptibility mapping of a catchment area using frequency ratio, fuzzy logic and multivariate logistic
- 520 regression approaches *Journal of the Indian Society of Remote Sensing* 38:301-320 doi:10.1007/s12524-010-0020-z
- 521 Pradhan B (2011a) Manifestation of an advanced fuzzy logic model coupled with Geo-information techniques to landslide
- 522 susceptibility mapping and their comparison with logistic regression modelling *Environmental and Ecological Statistics*
- 523 18:471-493 doi:10.1007/s10651-010-0147-7
- 524 Pradhan B (2011b) Use of GIS-based fuzzy logic relations and its cross application to produce landslide susceptibility maps in three
- 525 test areas in Malaysia *Environmental Earth Sciences* 63:329-349 doi:10.1007/s12665-010-0705-1
- 526 Remondo J, González A, Terán JRDD, Cendrero A, Fabbri A, Chung C-JF (2003) Validation of landslide susceptibility maps;
- 527 examples and applications from a case study in northern Spain *Natural Hazards* 30:437-449
- 528 doi:10.1023/B:NHAZ.0000007201.80743.fc
- 529 Roeloffs E (1996) Poroelastic techniques in the study of earthquake-related hydrologic phenomena 38:135-195
- 530 doi:10.1016/S0065-2687(08)60270-8
- 531 Ross TJ (1995) Fuzzy logic with engineering applications. McGraw-Hill, New York
- 532 Selby MJ (1982) Hillslope materials and processes. Oxford University Press, Oxford
- 533 Takahashi T (2014) Debris flow mechanics, prediction and countermeasures. second edn. Taylor & Francis/Balkema, The Netherlands
- 534 Tsukamoto Y, Ohta T, Noguchi H (1982) Hydrological and geomorphological studies of debris slides on forested hillslopes in Japan
- 535 *Journal des Sciences Hydrologiques* 27:234
- 536 Vallance JW, Scott KM (1997) The Osceola mudflow from Mount Rainier: Sedimentology and hazard implications of a huge clay-rich



- 537 debris flow Geological Society of America Bulletin 109:143-163  
 538 doi:10.1130/0016-7606(1997)109<0143:TOMFMR>2.3.CO;2
- 539 Wang J, Yu Y, Yang S, Lu G-h, Ou G-q (2014) A modified certainty coefficient method (M-CF) for debris flow susceptibility  
 540 assessment: A case study for the Wenchuan earthquake meizoseismal areas Journal of Mountain Science 11:1286-1297  
 541 doi:10.1007/s11629-013-2781-7
- 542 Wei Z, Shang Y, Zhao Y, Pan P, Jiang Y (2017) Rainfall threshold for initiation of channelized debris flows in a small catchment based  
 543 on in-site measurement Engineering Geology 217:23-34 doi:10.1016/j.enggeo.2016.12.003
- 544 Westen CJv, Rengers N, Soeters R (2003) Use of geomorphological information in indirect landslide susceptibility assessment Natural  
 545 Hazards 30:399-419 doi:10.1023/B:NHAZ.0000007097.42735.9e
- 546 Wu S, Chen J, Zhou W, Iqbal J, Yao L (2019) A modified Logit model for assessment and validation of debris-flow susceptibility  
 547 Bulletin of Engineering Geology and the Environment 78:4421-4438 doi:10.1007/s10064-018-1412-5
- 548 Xie H, Zhong D, Wei F, Wang S (2004) Classification of debris flow in the mountains of beijing Journal of mountain science  
 549 22:212-219 doi:10.16089/j.cnki.1008-2786.2004.02.013
- 550 Zadeh LA (1965) Fuzzy sets Information & Control 8:338-353 doi:10.1016/S0019-9958(65)90241-X
- 551 Zhang W, Chen J-p, Wang Q, An Y, Qian X, Xiang L, He L (2013) Susceptibility analysis of large-scale debris flows based on  
 552 combination weighting and extension methods Natural Hazards 66:1073-1100 doi:10.1007/s11069-012-0539-0
- 553 Zhang W, Li HZ, Chen Jp, Zhang C, Xu Lm, Sang Wf (2011) Comprehensive hazard assessment and protection of debris flows along  
 554 Jinsha River close to the Wudongde dam site in China Natural Hazards 58:459-477 doi:10.1007/s11069-010-9680-9
- 555 Zhang Y, Chen J, Tan C, Bao Y, Han X, Yan J, Mehmood Q (2021) A novel approach to simulating debris flow runout via a  
 556 three-dimensional CFD code: a case study of Xiaojia Gully Bulletin of Engineering Geology and the Environment  
 557 80:5293-5313 doi:10.1007/s10064-021-02270-x
- 558 Zhong D, Xie H, Wang S, Wei F, Jin H (2004) Debris flow in Beijing mountain. Commercial Press, Beijing
- 559 Zou Q, Cui P, He J, Lei Y, Li S (2019) Regional risk assessment of debris flows in China—An HRU-based approach Geomorphology  
 560 340:84-102 doi:10.1016/j.geomorph.2019.04.027  
 561
